1 **Small proteome of the nitrogen-fixing plant symbiont *Sinorhizobium meliloti***

2  
3 Lydia Hadjeras<sup>1</sup>, Benjamin Heiniger<sup>2\*</sup>, Sandra Maaß<sup>3\*</sup>, Robina Scheuer<sup>4\*</sup>, Rick Gelhausen<sup>5</sup>,  
4 Saina Azarderakhsh<sup>4</sup>, Susanne Barth-Weber<sup>4</sup>, Rolf Backofen<sup>5</sup>, Dörte Becher<sup>3</sup>, Christian H.  
5 Ahrens<sup>2,#</sup>, Cynthia M. Sharma<sup>1,#</sup>, Elena Evguenieva-Hackenberg<sup>3,#</sup>

6  
7 <sup>1</sup>Institute of Molecular Infection Biology, University of Würzburg, 97080 Würzburg, Germany

8 <sup>2</sup>Molecular Ecology, Agroscope and SIB Swiss Institute of Bioinformatics, 8046 Zurich,  
9 Switzerland

10 <sup>3</sup>Institute of Microbiology, University of Greifswald, 17489 Greifswald, Germany

11 <sup>4</sup>Institute of Microbiology and Molecular Biology, University of Giessen, 35392 Giessen,  
12 Germany

13 <sup>5</sup>Bioinformatics Group, Department of Computer Science, University of Freiburg, 79110  
14 Freiburg, Germany

15 \*: These authors contributed equally to the study

16 # correspondence

17

18

19 **Corresponding authors:**

20

21 Elena Evguenieva-Hackenberg: [Elena.Evguenieva-Hackenberg@mikro.bio.uni-](mailto:Elena.Evguenieva-Hackenberg@mikro.bio.uni-giessen.de)  
22 [giessen.de](mailto:Elena.Evguenieva-Hackenberg@mikro.bio.uni-giessen.de)

23

24 Cynthia M. Sharma: [cynthia.sharma@uni-wuerzburg.de](mailto:cynthia.sharma@uni-wuerzburg.de)

25

26 Christian H. Ahrens: [christian.ahrens@agroscope.admin.ch](mailto:christian.ahrens@agroscope.admin.ch)

27

28

29 **Keywords**

30 Ribosome profiling, proteomics, proteogenomics, small proteins, small open reading frame,  
31 *Sinorhizobium meliloti*, rhizobia

32 **ORCID-IDs** L. Hadjeras: 0000-0003-4645-8044; S. Maaß: 0000-0002-6573-1088; R.  
33 Gelhausen: 0000-0003-4161-4394; R. Backofen: 0000-0001-8231-3323; D. Becher: 0000-  
34 0002-9630-5735; C.M. Sharma: 0000-0002-2321-9705; C.H. Ahrens: 0000-0002-8148-7257;  
35 E. Evguenieva-Hackenberg: 0000-0001-7270-3168

## 1 **ABSTRACT**

2 The soil-dwelling plant symbiont *Sinorhizobium meliloti* is a major model organism of  
3 Alphaproteobacteria. Despite numerous detailed OMICS studies, information about small  
4 open reading frame (sORF)-encoded proteins (SEPs) is largely missing, because sORFs are  
5 poorly annotated, and SEPs are hard to detect experimentally. However, given that SEPs can  
6 fulfill important functions, cataloging the full complement of translated sORFs is critical for  
7 analyzing their roles in bacterial physiology. Ribosome profiling (Ribo-seq) can detect  
8 translated sORFs with high sensitivity, but is not yet routinely applied to bacteria because it  
9 must be adapted for each species. Here, we established a Ribo-seq procedure for *S. meliloti*  
10 2011 based on RNase I digestion and detected translation for 60% of the annotated coding  
11 sequences during growth in minimal medium. Using ORF prediction tools based on Ribo-seq  
12 data, subsequent filtering, and manual curation, the translation of 37 non-annotated sORFs  
13 with  $\leq 70$  amino acids was predicted with high confidence. The Ribo-seq data were  
14 supplemented by mass spectrometry (MS) analyses from three sample preparation  
15 approaches and two integrated proteogenomic search databases (iPtgxDBs). Searches  
16 against a standard and a 20-fold smaller Ribo-seq data-informed custom iPtgxDB confirmed  
17 many annotated SEPs and identified 11 additional novel SEPs. Epitope tagging and Western  
18 blot analysis confirmed the translation of 15 out of 20 SEPs selected from the translato-  
19 me map. Overall, by applying MS and Ribo-seq as complementary approaches, the small  
20 proteome of *S. meliloti* was substantially expanded by 48 novel SEPs. Several of them are  
21 conserved from *Rhizobiaceae* to Bacteria, suggesting important physiological functions.

22

## 1 INTRODUCTION

2 Over the last two decades, using next-generation sequencing and high throughput OMICS  
3 profiling technologies, the genomes of thousands of bacteria have been assembled, and  
4 the transcriptomes and proteomes of many of them have been analyzed under different  
5 conditions, with the aim of gaining insights into the genetic and molecular basis of their  
6 biology. Despite this wealth of data, information about small open reading frame (sORF)-  
7 encoded proteins (SEPs), which are proteins with less than 50 or 100 amino acids (aa), is  
8 scarce (Duval and Cossart 2017; Gray et al. 2022; Hemm et al. 2020; Orr et al. 2020; Storz  
9 et al. 2014). Recently, the small proteomes of eukaryotes, bacteria, and viruses have been  
10 focused on, as a growing number of small proteins have been demonstrated to fulfill  
11 important physiological functions, such as in cell division, metabolism, transport, signal  
12 transduction, spore formation, cell communication, cellular stress responses, and  
13 virulence (Aoyama et al. 2022; Duval and Cossart 2017; Hemm et al. 2020; Melior et al.  
14 2020; Khitun and Slavoff 2019; Patraquim et al. 2020; Song et al. 2022; Storz et al. 2014).  
15 Therefore, cataloging the full complement of small proteins is critical in achieving a more  
16 comprehensive and accurate description of the proteomes of bacterial model organisms  
17 and their potential functions.

18 Small protein identification is difficult due to several technical challenges. For instance,  
19 SEPs are difficult to detect using SDS-PAGE or mass spectrometry (MS) for various  
20 technical reasons (Ahrens et al. 2022; Fijalkowski et al. 2022; Storz et al. 2014).  
21 Limitations of standard shotgun proteomics workflows at the sample preparation,  
22 protease digestion, liquid chromatography, MS data acquisition, and bioinformatic data  
23 analysis steps affect comprehensive MS-based SEP identification (Ahrens et al. 2022;  
24 Cassidy et al. 2021). Furthermore, variable length thresholds were used in the genome  
25 annotation step to minimize the number of spurious ORF predictions. As a result, sORFs  
26 encoding truly expressed small proteins are often missing from genome annotations  
27 (Hahn et al. 2016; Storz et al. 2014). Meanwhile, various strategies to achieve extensive  
28 proteome coverage of the notoriously under-represented classes of small and membrane  
29 proteins (novel small proteins are often membrane associated) have been applied for  
30 prokaryotes (Omasits et al. 2013; Wiśniewski 2016; Zhang et al. 2013). Methods to enrich  
31 bacterial SEPs in samples are further improved, for example, with the use of small pore-  
32 sized solid-phase materials ( Bartel et al. 2020; Cassidy et al. 2019; Petruschke et al. 2020),

1 and digestion with alternative/multiple proteases has been performed to increase the  
2 number of identified SEPs ( Bartel et al. 2020; Kaulich et al. 2021; Petruschke et al. 2021).  
3 The obtained mass spectra are usually assigned to peptide or protein sequences by  
4 matching the determined fragment ion masses to the predictions derived from a sequence  
5 database (DB). Therefore, only peptides with sequences available in the protein search  
6 DB can be identified. Consequently, custom protein search DBs that try to capture the  
7 entire coding potential of prokaryotic genomes have been proposed, such as integrated  
8 proteogenomic search DBs (iPtgxDBs). They integrate and consolidate the differences  
9 among existing reference genome annotations, *ab initio* gene predictions, and a modified  
10 six-frame translation by considering alternative start sites, thereby enabling the detection  
11 of novel proteins, including SEPs (Omasits et al. 2017). Thus, proteogenomic studies that  
12 combine results from SEP-optimized MS data searched with iPtgxDBs or other custom  
13 search DBs and ribosome profiling (Ribo-seq) have great potential to detect highly  
14 comprehensive and accurate compendia of novel small proteins.

15 Ribo-seq has developed into a powerful method to study and annotate translato-  
16 mome globally, including sORFs (Ingolia 2016; Vazquez-Laslop et al. 2022). Compared with MS-  
17 based proteomics, Ribo-seq has the advantage of higher sensitivity (Ahrens et al. 2022;  
18 Duval and Cossart 2017; Gray et al. 2022; Hemm et al. 2020; Orr et al. 2020; Venturini et  
19 al. 2020; Storz et al. 2014). Ribo-seq relies on deep sequencing of approximately 30-nt-  
20 long “footprint” regions of the mRNA bound by the ribosome during translation and  
21 protected against nuclease digestion. In addition to providing a global picture of actively  
22 translated mRNAs in the cell, Ribo-seq also reveals the specific location on the RNA where  
23 the ribosome was bound, allowing the mapping of ORFs. For this, cells are lysed under  
24 certain conditions, allowing for the “freezing” of ribosomes on mRNAs. mRNA parts that  
25 are not protected by the ribosomes are then digested to generate ribosome footprints that  
26 are sequenced and mapped to the genome (Ingolia et al. 2009; Ingolia 2016). While Ribo-  
27 seq-based detection of translated mRNA works well for eukaryotic cells at a single codon  
28 resolution, this method is difficult to utilize for prokaryotes (Glaub et al. 2020;  
29 Mohammad et al. 2019; Vazquez-Laslop et al. 2022). Nevertheless, adapting and refining  
30 the Ribo-seq method has enabled the detection of many new, translated sORFs and  
31 corresponding SEPs not only in *Escherichia coli* but also in several other bacterial species  
32 and in halophilic archaea (Gelsinger et al. 2020; Meydan et al. 2019; Mohammad et al.  
33 2019; Vazquez-Laslop et al. 2022; Weaver et al. 2019). However, for many bacterial model

1 organisms, Ribo-seq data are still missing, as the protocols typically have to be adapted  
2 and optimized for each bacterial organism (Duval and Cossart 2017; Gray et al. 2022;  
3 Hemm et al. 2020; Orr et al. 2020; Venturini et al. 2020; Storz et al. 2014).

4 *Sinorhizobium meliloti* is an agriculturally important bacterial species that lives in soil and  
5 can fix molecular nitrogen in symbiosis with legume plants (Jones et al. 2007). Due to its  
6 versatile lifestyle and ecological relevance, it is a major model organism for studying gene  
7 regulation in Alphaproteobacteria. In addition, its relatively close relationship to  
8 pathogens of the genus *Brucella* makes *S. meliloti* an attractive model for host–pathogen  
9 research (Marlow et al. 2009). Several OMICS datasets are available for *S. meliloti* 2011  
10 and its sibling, *S. meliloti* 1021, which is the first sequenced strain of this species (Galibert  
11 et al. 2001). These consist of proteomics (Djordjevic 2004; Barra-Bily et al. 2010; Sobrero  
12 et al. 2012; Marx et al. 2016) and transcriptomic datasets, including differential RNA-seq  
13 that enables the annotation of transcription start sites, 5' and 3' UTRs, and novel  
14 transcripts (Becker et al. 2004; Schlüter et al. 2013; Sallet et al. 2013). The *S. meliloti* 2011  
15 6.7 Mb genome harbors a 3.66 Mb chromosome and two megaplasmids, the 1.35 Mb  
16 pSymA and the 1.68 Mb pSymB (Sallet et al. 2013). As a proof of principle, an iPtgxDB  
17 created for *S. meliloti* 2011 has allowed the detection of the 14-aa-long leader peptide  
18 peTrpL in the proteomic data, in which a function in resistance to multiple antimicrobial  
19 compounds can be subsequently established (Melior et al. 2020). However, the  
20 identification of additional functional SEPs in *S. meliloti* and related Alphaproteobacteria  
21 has been limited by the lack of studies specifically targeting the small proteome and  
22 translome.

23 Here, we developed and then applied Ribo-seq on *S. meliloti* 2011 to map its translome  
24 globally, with a focus on the small proteome (data available at our interactive web-based  
25 genome-browser: <http://www.bioinf.uni-freiburg.de/ribobase>). The use of RNase I in our  
26 Ribo-seq showed successful trimming of mRNA regions that were not protected by  
27 ribosomes, allowing differentiation between translated and untranslated regions. Besides  
28 detecting the translation of annotated sORFs (some of which are available in recent  
29 updates of the genome annotation), we also uncovered 37 translated novel, non-  
30 annotated sORFs located on different replicons. The translation of several annotated, as  
31 well as novel, sORFs was further validated by MS-based proteomics using iPtgxDBs  
32 and/or epitope tagging and Western blot analysis, thereby confirming predictions based

1 on Ribo-seq coverage. Eleven novel SEPs were uniquely identified by MS, showing that  
2 using both methods when mapping the small proteome is advantageous. Overall, our  
3 combined approach provided a set of 48 novel *S. meliloti* sORFs, many of which are  
4 conserved, as a resource to further elucidate their roles in bacterial physiology and  
5 symbiosis.

6  
7  
8

## 9 **METHODS**

### 10 **Growth and harvest of *S. meliloti* for Ribo-seq**

11 *S. meliloti* 2011 (Casse et al. 1979) was first cultivated on TY (5 g of BactoTryptone, 3 g of  
12 Bacto-yeast extract, and 0.3 g of CaC<sub>2</sub> per liter) agar plates (Beringer 1974). The plate cultures  
13 were used to inoculate liquid cultures, which were grown semi-aerobically (routinely, 30 ml  
14 of medium in a 50 ml Erlenmeyer flask under constant agitation at 140 rpm) at 30 °C in GMS  
15 minimal medium (10 g of D-mannitol, 5 g of sodium glutamate, 5 g of K<sub>2</sub>HPO<sub>4</sub>, 0.2 g of MgSO<sub>4</sub>  
16 × 7H<sub>2</sub>O, and 0.04 g of CaCl<sub>2</sub> per liter; trace elements: 0.05 mg of FeCl<sub>3</sub> × 6H<sub>2</sub>O, 0.01 mg of H<sub>3</sub>Bo<sub>3</sub>,  
17 0.01 mg of ZnSO<sub>4</sub> × 7H<sub>2</sub>O, 0.01 mg of CoCl<sub>2</sub> × 6H<sub>2</sub>O, 0.01 mg of CuSO<sub>4</sub> × 5H<sub>2</sub>O, 1.35 mg of MnCl<sub>2</sub>,  
18 and 0.01 mg of Na<sub>2</sub>MoO<sub>4</sub> × 2H<sub>2</sub>O per liter; 10 µg of biotin and 10 mg of thiamine per liter)  
19 (Zevenhuizen and van Neerven 1983). As the strain exhibits chromosomally encoded  
20 streptomycin resistance, 250 µg/ml streptomycin was added to the media. For Ribo-seq  
21 sample preparation, cells corresponding to 40 OD<sub>600</sub> equivalent units were harvested after  
22 rapid chilling in an ice bath to halt cell growth and translation. In brief, cultures in the  
23 exponential phase (OD<sub>600nm</sub> 0.5) were rapidly placed in a pre-chilled flask in an ice-water bath  
24 and incubated with gentle shaking for 3 min. Cells were then immediately pelleted by  
25 centrifugation (10 min at 6000 ×g) before snap-freezing in liquid N<sub>2</sub>. Before centrifugation, a  
26 culture aliquot was withdrawn for total RNA analysis, mixed with 0.2 vol stop mix (5% buffer-  
27 saturated phenol [Roth] in 95% ethanol), and snap-frozen in liquid N<sub>2</sub>. Even though  
28 translation elongation inhibitors have been extensively used in both eukaryotic and bacterial  
29 Ribo-seq workflows, using such chemicals can introduce bias into Ribo-seq coverage  
30 (Gerashchenko and Gladyshev 2014; Mohammad et al. 2019). Therefore, we chose to perform  
31 Ribo-seq without these inhibitors because we were able to recover sufficient polysomes using  
32 the fast-chilling method (see **Fig. 1**).

## 1 **Preparation of ribosome footprints**

2 Ribo-seq was performed as previously described (Oh et al. 2011), with some  
3 modifications. In brief, cell pellets were resuspended with cold lysis buffer (1 M NH<sub>4</sub>Cl, 150  
4 mM MgCl<sub>2</sub>, 20 mM Tris-HCl, 5 mM CaCl<sub>2</sub>, 0.4% Triton X-100, 150 U DNase I [Fermentas],  
5 and 1000 U RNase Inhibitor [MoloX, Berlin] at pH 8.0) and lysed by sonication (constant  
6 power 50%, duty cycle 50%, and 3 × 30 s cycles with 30 s cooling on a water-ice bath  
7 between each sonication cycle to avoid heating of the sample). The lysate was clarified by  
8 centrifugation at 10,000 × g for 12 min at 4 °C. Approximately 15 A<sub>260</sub> of lysate 200 U of  
9 RNase I (Thermo Fisher Scientific) was added. Polysome digestion was performed at 25  
10 °C with shaking at 650 rpm for 90 min. A mock-digested control (no enzyme added) was  
11 performed in parallel to confirm the presence of polysomes in the lysate. To analyze  
12 polysome profiles and recover digested monosomes, we layered 15 A<sub>260</sub> units onto a linear  
13 10%–55% sucrose gradient prepared in 4X gradient buffer (10X gradient buffer: 100 mM  
14 MgCl<sub>2</sub>, 200 mM Tris-HCl, 1 M NH<sub>4</sub>Cl, and 20 mM dithiothreitol [DTT] at pH 8.0) in an  
15 ultracentrifuge tube (13.2 mL Beckman Coulter SW-41). Gradients were centrifuged in a  
16 SW40-Ti rotor at 35,000 rpm for 2 h and 30 min at 4 °C in a Beckman Coulter Optima XPN-  
17 80 ultracentrifuge. Gradients were processed using a gradient station (IP, Biocomp  
18 Instruments) fractionation system with continuous absorbance monitoring at 254 nm to  
19 resolve ribosomal subunit peaks. The 70S monosome fractions were collected and  
20 subjected to RNA extraction to purify the RNA footprints. RNA was extracted from  
21 fractions or cell pellets for total RNA using hot phenol-chloroform-isoamyl alcohol  
22 (25:24:1, Roth) or hot phenol (Roth), respectively, as previously described (Sharma et al.  
23 2007; Venturini et al. 2020). Ribosomal RNA (rRNA) was depleted from 5 µg of DNase I-  
24 digested total RNA by subtractive hybridization with the Pan-Bacteria riboPOOLS  
25 (siTOOLS, Germany) according to the manufacturer's protocol with Dynabeads MyOne  
26 Streptavidin T1 beads (Invitrogen). Total RNA was fragmented with an RNA  
27 fragmentation reagent (Ambion). Monosome RNA and fragmented total RNA were size  
28 selected (26–34 nt) on 15% polyacrylamide/7 M urea gels, as previously described  
29 (Ingolia et al. 2012) using RNA oligonucleotides NI-19 and NI-20 as guides. RNA was  
30 cleaned and concentrated by isopropanol precipitation with 15 µg of GlycoBlue (Ambion)  
31 and dissolved in H<sub>2</sub>O. cDNA libraries were prepared by Vertis Biotechnologie AG (Freising,  
32 Germany) using the adapter ligation protocol without fragmentation. First, an  
33 oligonucleotide adapter was ligated to the 3' end of the RNA molecules. First-strand cDNA

1 synthesis was performed using M-MLV reverse transcriptase and the 3' adapter as the  
2 primer. The first strand of cDNA was purified, and the 5' Illumina TruSeq sequencing  
3 adapter was ligated to the 3' end of the antisense cDNA. The resulting cDNA was PCR-  
4 amplified to approximately 10–20 ng/μl using a high-fidelity DNA polymerase. The DNA  
5 was purified using the Agencourt AMPure XP kit (Beckman Coulter Genomics) and  
6 analyzed by capillary electrophoresis. The primers used for PCR amplification were  
7 designed for TruSeq sequencing according to the instructions of Illumina. The following  
8 adapter sequences flank the cDNA inserts: TruSeq\_Sense\_primer: (NNNNNNNN = i5  
9 Barcode for multiplexing) 5'-AATGATACGGCGACCACCGAGATCTACAC-NNNNNNNN-  
10 ACACTCTTCCCTACA CGACGCTCTCCGATCT-3'; TruSeq\_Antisense\_primer:  
11 (NNNNNNNN = i7 Barcode for multiplexing) 5'-CAAGCAGAAGACGGCATAACGAGAT-  
12 NNNNNNNN-GTGACTGGAGTTCAGACGTGT GCTCTCCGATCT-3'. cDNA libraries were  
13 pooled on an Illumina NextSeq 500 high-output flow cell and sequenced in single-end  
14 mode (75 cycles, with 20 million reads per library) at the Core Unit SysMed at the  
15 University of Würzburg.

## 16 **Ribo-seq data analysis**

17 *S. meliloti* Ribo-seq data were processed and analyzed using the published HRIBO  
18 workflow (version 1.6.0) (Gelhausen et al. 2021), which has previously been used for the  
19 analysis of bacterial Ribo-seq data (Venturini et al. 2020). In brief, sequencing read files  
20 were processed with a snakemake (Köster and Rahmann 2012) workflow, which  
21 downloads all required tools from bioconda (Grüning et al. 2018) and automatically  
22 determines the necessary processing steps. Adapters were trimmed from the reads with  
23 cutadapt (version 2.1) (Martin 2011) and then mapped against the *S. meliloti* 2011 genome  
24 with segemehl (version 0.3.4) (Otto et al. 2014). Reads corresponding to rRNA and other  
25 multiply mapping reads were removed with SAMtools (version 1.9) (Li et al. 2009).  
26 Quality control was performed by creating read count statistics for each processing step  
27 and RNA class with Subread featureCounts (1.6.3) (Liao et al. 2014). All processing steps  
28 were analyzed with FastQC (version 0.11.8) (Wingett and Andrews 2018), and the results  
29 were aggregated with MultiQC (version 1.7) (Ewels et al. 2016). Summary statistics are  
30 shown in **Table S1**.

31 Read coverage files were generated with HRIBO using different full-read mapping  
32 approaches (global or centered) and single-nucleotide mapping strategies (5' or 3' end).



1 Read coverage files using two different normalization methods were created (mil and  
2 min). For the mil normalization, read counts were normalized by the total number of  
3 mapped reads within the sample and scaled by a per-million factor. For the min  
4 normalization, the read counts were normalized by the total number of mapped reads  
5 within the sample and scaled by the minimum number of mapped reads among all  
6 analyzed samples. The coverage files generated using the min normalization and the  
7 global mapping (full read) approach were used for genome browser visualization.  
8 Metagene analysis of ribosome density at start codons was performed as previously  
9 described (Becker et al. 2013).

### 10 **Ribo-seq-based ORF prediction, filtering, and manual curation**

11 ORFs were called with an adapted variant of REPARATION (Ndah et al. 2017) using blast  
12 instead of usearch (see [https://github.com/RickGelhausen/REPARATION\\_blast](https://github.com/RickGelhausen/REPARATION_blast)) and  
13 DeepRibo (Clauwaert et al. 2019). In addition, generic feature format (GFF) track files with  
14 the same information were created for in-depth manual genome browser inspection, as  
15 well as GFF files showing potential start and stop codons and ribosome binding site  
16 information. Summary statistics for all available GenBank annotated and merged novel  
17 ORFs detected by REPARATION and DeepRibo were computed in a tabularized form,  
18 including, among other values, translation efficiency (TE), RPKM (reads per kilobase of  
19 transcript per million mapped reads) normalized read counts, codon counts, and  
20 nucleotide and aa sequences (see **Table S2**). Annotated sORFs were classified as translated  
21 if they fulfilled an arbitrary mean TE cut-off of  $\geq 0.5$  and RNA-seq and Ribo-seq RPKM of  $\geq$   
22 10 (cut-offs chosen based on the lowest TE and RPKM values associated with housekeeping  
23 genes [i.e., ribosomal protein genes] and the genes detected by proteomics). To identify  
24 strong candidates for novel sORFs, we inspected HRIBO ORF predictions from DeepRibo  
25 and REPARATION. As DeepRibo is prone to a high rate of false positives (Gelhausen et al.  
26 2022), we first generated a reasonable set of potential novel sORFs by applying the  
27 following expression cut-off filters: mean TE of  $\geq 0.5$  and RNA-seq and Ribo-seq RPKM of  
28  $\geq 10$  (in both replicates) based on the 85 positively labeled translated sORFs (see **Fig. 3**).  
29 In addition, novel translated sORF candidates were required to be predicted by DeepRibo  
30 with a prediction score of  $> -0.5$  that allows for ORF candidate ranking (Clauwaert et al.  
31 2019). The filtered sORFs were then subjected to manual curation, that is, inspection of the  
32 Ribo-seq coverage in a genome browser. To assert translation, we considered the evenness

1 of the Ribo-seq coverage, its restriction to the predicted ORF, and the high read coverage  
2 in the footprint library compared with the corresponding transcriptome library. We  
3 created an interactive web-based genome browser using JBrowse (<http://www.bioinf.uni->  
4 [freiburg.de/ribobase](http://www.bioinf.uni-freiburg.de/ribobase)) (Buels et al. 2016), where the coverage files for the Ribo-seq  
5 replicates, the annotation, and the predicted sORF can be visualized.

## 6 **Sample preparation for MS**

7 For MS analysis, cells of 1.5 l of an *S. meliloti* culture ( $OD_{600nm}$  0.5) were harvested by centrifugation  
8 at 6,000 rpm and 4°C. The cell pellet was resuspended in 30 ml of buffer containing 20 mM Tris,  
9 150 mM KCl, 1 mM MgCl<sub>2</sub>, and 1 mM DTT at pH 7.5. After lysis by sonication and centrifugation  
10 at 13,000 rpm for 30 min at 4°C, the cleared lysates were frozen in liquid nitrogen and stored at  
11 -80 °C. To generate a highly comprehensive small protein dataset, we used three  
12 complementary approaches for sample preparation: 1) tryptic in-solution digest of all  
13 proteins in the sample, 2) solid-phase enrichment (SPE) of small proteins without any  
14 subsequent digestion, and 3) SPE of small proteins with subsequent digestion using Lys-C.  
15 Sample preparation was performed as previously described (Bartel et al. 2020) with some  
16 modifications. In brief, samples for tryptic in-solution digests were reduced and alkylated  
17 before trypsin was added in an enzyme-to-protein ratio of 1:100, and samples were  
18 incubated at 37 °C for 14 h. The digest was stopped by acidifying the mixture with HCl. For  
19 SPE, samples were loaded on an equilibrated column packed with an 8.5 nm pore size,  
20 modified styrene-divinylbenzene resin (8B-S100-AAK, Phenomenex), which was then  
21 washed to remove large proteins. The enriched small protein fraction was eluted with 70%  
22 (v/v) acetonitrile and evaporated to dryness in a vacuum centrifuge. The SPE samples were  
23 either directly used for MS or in-solution digested as described above but with Lys-C instead  
24 of trypsin.

## 25 **Generation of standard and custom iPtgxDBs to identify novel SEPs**

26 iPtgxDBs were generated based on the *S. meliloti* 2011 ASM34606v1 reference genome  
27 sequence as described (Omasits et al. 2017). Annotations from several reference genome  
28 centers and/or releases (GenBank 2014, RefSeq2017, Genoscope), two *ab initio* gene  
29 predictions (Prodigal, ChemGenome), and *in silico* ORF predictions were hierarchically  
30 integrated for a trypsin-specific iPtgxDB as previously detailed (Melior et al. 2020),  
31 (<https://iptgxdb.expasy.org/database/annotations/s-meliloti-tryptic>; see **Table S3.1**). To  
32 capture data from all three experimental approaches, two more iPtgxDBs were created in a

1 similar fashion using command-line utilities. While default settings were used to create the  
2 trypsin-specific iPtgxDB, for the LysC-specific iPtgxDB, the regular expression “(K)(.)” was  
3 used, allowing cleavage after every lysine. The iPtgxDB for the experiments without protease  
4 digestion was generated with a regular expression that did not allow any cleavages. In  
5 addition, three 20-fold smaller custom iPtgxDBs were created to improve search  
6 statistics/predictive potential. For these, instead of adding the Chemgenome and *in silico*  
7 predictions, 266 selected Ribo-seq translation products identified from the sORF prediction  
8 tools DeepRibo (Clauwaert et al. 2019) and Reparation (Ndah et al. 2017), as well as manual  
9 analysis, were converted to GFF format using a custom Python script and integrated along  
10 with the RefSeq, GenBank, Genoscope, and Prodigal predictions to create the respective  
11 iPtgxDBs (Tables S3.3 and S3.4). All six iPtgxDBs (downloadable from  
12 <https://iptgxdb.expasy.org>) also contained sequences of common laboratory contaminants  
13 (116 from CrapOme and 256 from the Functional Genomics Center Zurich). All peptides  
14 implying potentially novel proteins were subjected to a PeptideClassifier analysis (Qeli and  
15 Ahrens 2010) extended for proteogenomics in prokaryotes (Omasits et al. 2017). This  
16 procedure ensures that i) only unambiguous peptides were considered (class 1a) or ii)  
17 annotation cluster-specific cases can be distinguished: Class 2a peptides imply a subset of all  
18 possible proteoforms (e.g., like an extension, reduction), class 2b peptides imply all isoforms,  
19 which means that the gene encoding the proteoforms, but not a specific proteoform, was  
20 identified.

## 21 **MS analysis**

22 Samples were loaded on an EASY-nLC 1200 (Thermo-Fisher Scientific) equipped with an in-  
23 house-built 20 cm reversed-phase column packed with 3  $\mu\text{m}$  Repronil-Pur 120 C18-AQ (Dr.  
24 Maisch) and an integrated emitter tip. Peptides were eluted by a 156 min non-linear gradient  
25 of solvent B (0.1% v/v acetic acid in acetonitrile) and injected online in an Orbitrap Velos  
26 (Thermo-Fisher Scientific). The survey scans were acquired in the Orbitrap (300–1700 Th;  
27 60,000 resolution at 400 m/z;  $1 \times 10^6$  predictive automatic gain control target; activated lock  
28 mass correction). After collision-induced dissociation with a normalized collision energy of  
29 35, fragment spectra were recorded in the LTQ (mass range dependent on precursor m/z;  $3$   
30  $\times 10^6$  predictive automatic gain control) for the 20 most abundant ions. Fragmented ions were  
31 dynamically excluded from fragmentation for 30 s.

1 DB searches were performed with Sorcerer-SEQUEST 4 (Sage-N Research, Milpitas, USA),  
2 allowing two missed cleavages for samples derived from tryptic in solution digest or LysC  
3 digested SPE samples and with non-specified enzymes for SPE samples without proteolytic  
4 digest. No fixed modifications were considered, and oxidation of methionine was considered  
5 a variable modification. The mass tolerance for precursor ions was set to 10 ppm, and the  
6 mass tolerance for fragment ions was set to 1.0 Da. Validation of MS/MS-based peptide and  
7 protein identification was performed with Scaffold V4.8.7 (Proteome Software, Portland,  
8 USA), and peptide identifications were accepted if they exhibited at least deltaCn scores of >  
9 0.1 and XCorr scores of > 2.2, 3.3, and 3.75 for doubly, triply, and all high-charged peptides,  
10 respectively. Identifications for proteins of > 15 kDa were only accepted if at least two unique  
11 peptides were identified. Proteins that contained ambiguous, non-unique peptides and could  
12 not be differentiated based on MS/MS analysis alone were grouped to satisfy the principles  
13 of parsimony (Sorcerer-SEQUEST). Identifications for annotated proteins of < 15 kDa were  
14 accepted if at least one unique peptide was identified with at least two peptide spectrum  
15 matches (PSMs). To identify novel proteins, we required additional PSM evidence from  
16 predictions as described before (Varadarajan et al. 2020a, 2020b), that is, 3 PSMs for *ab initio*  
17 predictions and 4 PSMs from *in silico* predictions. Here, we also allowed *in silico* candidates  
18 with 3 PSMs if they were observed in each of the three replicates. Similar to the RefSeq  
19 annotated proteins, novel proteins longer than 150 aa required two unique peptides  
20 (however, these were not the focus of this study). The application of these filter criteria kept  
21 the protein false discovery rate (FDR) below 1%. To facilitate overview and comparison, we  
22 integrated MS-identified proteins, Ribo-Seq, and Western blot analysis data in a “master  
23 table” (**Table S4**).

## 24 **Cloning procedures**

25 The oligonucleotides (Microsynth) used for cloning are listed in **Table S5**. Routinely,  
26 FastDigest Restriction Endonucleases and Phusion polymerase (Thermo Fisher Scientific)  
27 were used. PCR products were first ligated into pJet1.2/blunt (CloneJet PCR Cloning Kit,  
28 Thermo Fisher Scientific) and transformed into *E. coli* DH5-alpha. Subsequently, inserts  
29 were subcloned in conjugative plasmids originating from pSRKGm (Khan et al. 2008).  
30 Insert sequences were analyzed by Sanger sequencing with plasmid-specific primers  
31 (Microsynth Seqlab). *E. coli* S17-1 was used to transfer the plasmids to *S. meliloti* 2011 by  
32 diparental conjugation (Simon et al. 1983).

1 Plasmid pSW2 was used to clone the candidate sORFs. It was constructed using pRS1, a  
2 derivative of pSRKGm, in which the *E. coli lac* module was exchanged for a multiple  
3 cleavage site-containing cloning site for the restriction endonucleases NheI, HindIII, XbaI,  
4 SpeI, BamHI, PstI, and EcoRI. First, a transcription terminator  $T_{trn}$  from *Bradyrhizobium*  
5 *japonicum* USDA 110 was cloned into the EcoRI restriction site of pRS1. For this, the  
6 terminator containing sequence was amplified with the forward primer Bj-Trrn-Fw-2019  
7 and the reverse primer Bj-Trrn-Rv-2019 using plasmid pJH-01 as a template (Čuklina et  
8 al. 2016). In the PCR product, an EcoRI restriction site was present downstream of the  
9 forward primer sequence. This restriction site and that in the reverse primer were used  
10 for the transcription terminator cloning. A clone with the desired orientation was  
11 selected, and the plasmid was named pRS1-Trrn (**Fig. S1**). Double-stranded DNA  
12 encoding a sequential peptide affinity (SPA) tag, which is composed of the calmodulin-  
13 binding peptide and three modified FLAG sequences separated by a TEV protease  
14 cleavage site (Zeghouf et al. 2004), was then cloned between the BamHI and EcoRI  
15 cleavage sites of pRS1-Trrn. The SPA-tag encoding sequence was designed without an  
16 ATG codon, without rare codons, and with Gly-Gly-Gly-Ser linker codons at the 5' end and  
17 adapted to the high GC content of *S. meliloti*. It was generated synthetically by Eurofins  
18 and provided on plasmid pEX-A128, which was used as a template for PCR amplification  
19 with primers SmSPA-Ct-BamFW and SmSPA-Ct-EcoRv. The resulting plasmid pSW1 can  
20 be used to clone an sORF in frame with the SPA-encoding sequence and under the control  
21 of its own promoter. Here, pSW1 was used to clone the promoter  $P_{sinI}$  between the NheI  
22 and XbaI restriction sites. The promoter sequence (McIntosh et al. 2008) was amplified  
23 using primers NheI-PsinI-FW and XbaI- PsinI-RV and *S. meliloti* 2011 genomic DNA as a  
24 template. The resulting pSW2 plasmid was used to clone candidate sORFs, each with a 15-  
25 nt upstream region potentially harboring a Shine-Dalgarno sequence between the XbaI  
26 and BamHI restriction sites (**Fig. S1**). In total, 20 sORF::SPA fusions were cloned and  
27 tested by Western blot analysis. The corresponding plasmids were designated from  
28 pSW2-SEP1 to pSW2-SEP20.

## 29 **Western blot analysis**

30 Exponentially grown *S. meliloti* cells ( $OD_{600nm}$  0.5; minimal medium) were harvested (3,500  
31  $\times$ g for 10 min at 4 °C) and resuspended in an SDS-loading buffer. After incubation for 5  
32 min at 95 °C, the crude lysate proteins were separated by Tricine-SDS PAGE (16%) and  
33 blotted onto a PVDF membrane (Amerham™Hybond™, 0.2  $\mu$ M PVDF; GE Healthcare Life

1 Science, Chalfont St Giles, Great Britain) as described (Schägger 2006). For detection,  
2 monoclonal ANTI-FLAG M2-Peroxidase (HRP) antibodies (Merck, Darmstadt, Germany)  
3 and Lumi-Light Western-Blot-Substrate (Roche, Basel, Schweiz) were used. Signal  
4 visualization was performed with a chemiluminescence imager (Fusion SL4, Vilber,  
5 Eberhardzell, Germany). For fractionation, the cell pellets were resuspended in TKMDP  
6 buffer containing 20 mM Tris-HCl, 150 mM KCl, 1 mM MgCl<sub>2</sub>, 1 mM DTT, and one protease  
7 inhibitor cocktail tablet at pH 7.5 (Sigma Aldrich, St. Louis, USA). Lysates prepared by  
8 three passages in a French press at 1,000 psi were cleared by centrifugation at 14,000 ×g  
9 for 30 min at 4 °C. The supernatant was subjected to ultracentrifugation at 100,000 ×g for  
10 1 h at 4 °C. The supernatant (S100 fraction) was then removed, and the P100 pellet was  
11 resuspended in the same volume of TKMDP buffer.

## 12 **Conservation and domain search analyses**

13 The identification of novel small protein homologues was performed using Blastp and  
14 tBlastn searches in bacteria on the National Center for Biotechnology Information DB  
15 (<https://blast.ncbi.nlm.nih.gov/Blast.cgi>). The protein sequences for novel protein  
16 candidates identified by Ribo-seq and/or MS were used as query sequences. For tBlastn,  
17 the following parameters were used: the filter for low complexity regions off, a seed length  
18 that initiates an alignment (word size) of 6, 60% coverage of the query sequence with at  
19 least 40% identity, an E-value (Expect value) of ≤100 to capture all potential orthologs, and  
20 an E-value between 0.01 and 1 for high-confidence hits (Allen et al. 2014). Moreover, novel  
21 small proteins discovered in this study were further analyzed for secondary structure and  
22 predicted protein domains and predictions of lipoproteins, as well as potential subcellular  
23 localization using predictions from the Phyre2 v2.0  
24 (<http://www.sbg.bio.ic.ac.uk/~phyre2/>), LipoP-1.0  
25 (<https://services.healthtech.dtu.dk/service.php?LipoP-1.0>) TMHMM v2.0  
26 (<https://services.healthtech.dtu.dk/service.php?TMHMM-2.0>), and PSORTb v3.0.2  
27 servers (<https://www.psорт.org/psортb/>).

## 28 **Data availability**

29 The MS-based proteomics data were deposited to the ProteomeXchange Consortium at the  
30 PRIDE partner repository, with dataset identifier PXD034931. The iPtgxDBs can be  
31 downloaded from <https://iptgxdb.expasy.org/>. Ribo-seq and RNA-seq data were deposited  
32 in GEO, with accession number GSE206492. The Ribo-seq and RNA-seq data of *S. meliloti*

1 2011 can be viewed with an interactive online JBrowse instance ([http://www.bioinf.uni-](http://www.bioinf.uni-freiburg.de/ribobase)  
2 [freiburg.de/ribobase](http://www.bioinf.uni-freiburg.de/ribobase)).

3

## 4 **RESULTS**

### 5 **Establishing Ribo-seq in *S. meliloti* to map its translome**

6 To provide a genome-wide map of translated annotated sORFs and to reveal new sORFs in  
7 the plant symbiont *S. meliloti*, we first adapted the Ribo-seq protocol (Oh et al. 2011) to this  
8 organism (**Fig. 1A**). For this purpose, several steps, including cell harvest, lysis, and footprint  
9 generation, were optimized (see Methods). *S. meliloti* 2011 cells were grown to the mid-log  
10 phase in minimal medium, and samples were rapidly cooled and harvested to avoid polysome  
11 run-off. Polysome profile analysis after lysate fractionation on a sucrose gradient showed  
12 successfully captured translating ribosomes (**Fig. 1B**, black profile). The mRNA should be  
13 ribonucleolytically digested outside ribosomes to produce ribosome footprints. Since the  
14 broad-range ribonuclease RNase I, which is often used for eukaryotic Ribo-seq analysis, is  
15 inactive on polysomes from enteric bacteria (Bartholomäus et al. 2016), most prokaryotic  
16 Ribo-seq protocols mainly use micrococcal nuclease (MNase) instead. However, MNase  
17 preferentially cleaves at pyrimidines, introduces periodicity artifacts, and generates  
18 footprints that are more heterogeneous in length than those from RNase I (Ingolia 2016;  
19 Vazquez-Laslop et al. 2022). Therefore, we used RNase I to convert *S. meliloti* polysomes into  
20 monosomes (**Fig. 1B**) and to generate ribosome footprints (**Fig. 1C–1E**). By comparing Ribo-  
21 seq read coverage data and expression signals from a paired RNA-seq library generated from  
22 fragmented total RNA, features, such as coding potential, ORF boundaries, and 5' and 3' UTRs,  
23 can be defined (**Fig. 1C–1E**).

24 Inspection of Ribo-seq coverage for translated ORFs and known non-coding transcripts  
25 further demonstrated the successful setup of Ribo-seq in *S. meliloti*. For example, the protein-  
26 coding genes *rpsO* and *icd* showed higher cDNA read coverage in the Ribo-seq library  
27 compared with the paired RNA-seq library (**Fig. 1C**), whereas the RNase P RNA gene *rnpB*  
28 showed high cDNA read coverage only in the RNA-seq library (**Fig. 1D**). Furthermore, the  
29 cDNA read coverages of the 5' and 3' UTRs of *rpsO* and *icd* were higher in the RNA-seq library  
30 than in the Ribo-seq library (**Fig. 1C**), showing successful digestion of non-translated or

1 unprotected mRNA regions by RNase I. Similarly, the protein-coding polycistronic *fixN1QP*  
 2 mRNA showed high read coverage in the Ribo-seq library along its four ORFs. In contrast, the  
 3 5' leader and 3' trailer mainly showed coverage in the RNA-seq library, suggesting that they  
 4 were digested by RNase I (**Fig. 1E**).

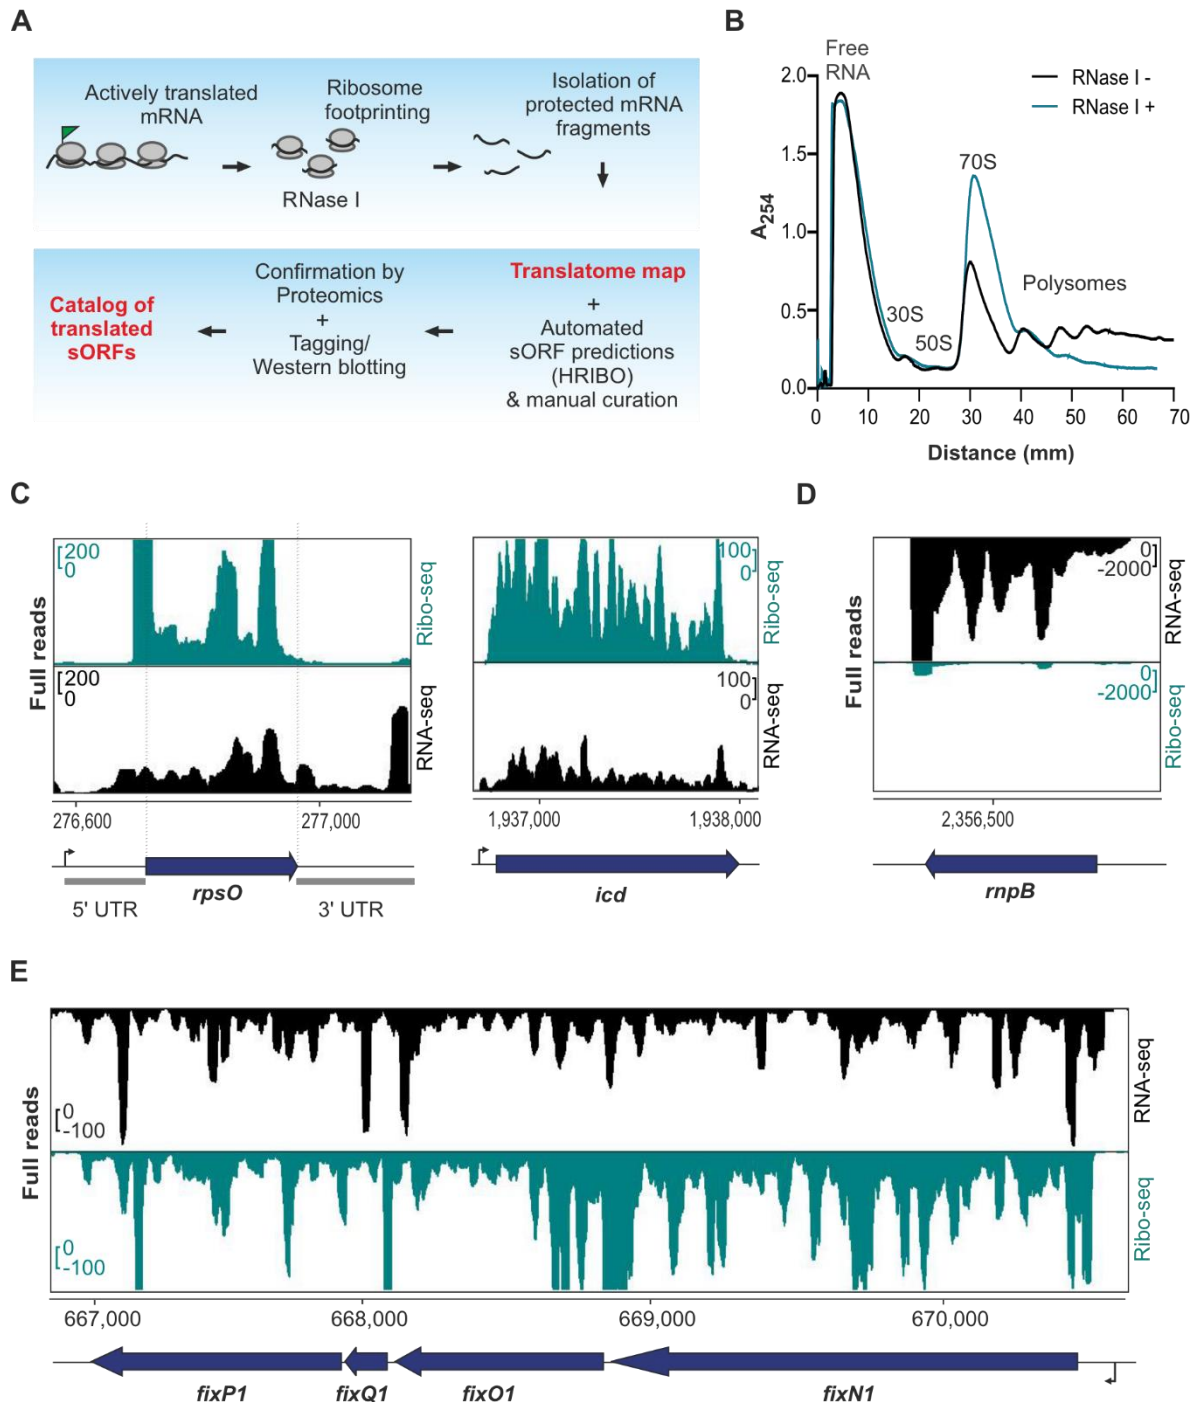

5  
 6 **Figure 1. Establishment of ribosome profiling (Ribo-seq) for *Sinorhizobium meliloti*.** (A)  
 7 Schematic Ribo-seq workflow to map the *S. meliloti* 2011 translome. Translating ribosomes  
 8 (indicated by the polysome fraction) were first captured on the mRNAs. Unprotected mRNA regions



1 were digested by RNase I, converting polysomes to monosomes. Approximately 30-nt-long footprints  
2 protected by and co-purified with 70S ribosomes were then subjected to cDNA library preparation  
3 and deep sequencing to identify the translome under the used conditions. The small proteome was  
4 identified using HRIBO automated predictions and manual curation. Mass spectrometry and Western  
5 blot analysis of recombinant, tagged small open reading frame (sORF)-encoded proteins were used to  
6 validate the translated sORFs. **(B)** Sucrose gradient fractionation of the lysates. Cells were harvested  
7 at the exponential growth phase by a fast-chilling method to avoid polysome run-off. RNase I digestion  
8 led to enrichment of monosomes (70S peak in the green profile) in contrast to the untreated sample  
9 (Mock, black profile). Absorbance at 254 nm was measured. **(C)** Integrated genome browser  
10 screenshots depicting reads from Ribo-seq and RNA-seq libraries for two annotated ORFs: *rpsO*  
11 encoding ribosomal protein S15 and *icd* encoding isocitrate dehydrogenase. They show read coverage  
12 enrichment in the Ribo-seq library along their coding parts in contrast to the RNA-seq library but not  
13 in the ribosome-non-protected regions (UTRs). The UTRs of *rpsO* are marked. **(D)** Read coverage for  
14 *rnpB* corresponding to the housekeeping RNase P RNA. Reads are mostly restricted to the RNA-seq  
15 library, suggesting that this RNA is not translated. **(E)** The *fixN1OQP* operon shows read coverage in  
16 both the RNA-seq library and Ribo-seq library, the latter indicating that this operon contains  
17 translated genes. Genomic locations and coding regions are indicated below the image. Bent arrow  
18 indicates the transcription start site based on (Sallet et al. 2013).

19  
20 The high ribosome density in the Ribo-seq library, which covers the 14 and 12-nt-long  
21 intergenic regions between *fixN1* - *fixO1* and *fixO1* - *fixQ1*, probably represents the footprints  
22 of ribosomes that terminate the translation of the upstream ORF and initiate the translation  
23 of the downstream ORF. Such events are slower than elongation at most codons in an ORF  
24 (Oh et al. 2011). The latter example indicates the translation of the sORF *fixQ1*, which encodes  
25 a 50 aa protein (**Fig. 1E**).

26 Metagene analysis of ribosome occupancy near all annotated start codons (i.e., ATG, GTG, and  
27 TTG) showed an enriched ribosome density at the -16 nt upstream (mapping of the 5' ends  
28 of the footprints) and at +16 nt downstream (mapping of the 3' ends of the footprints) (**Fig.**  
29 **S2A and S2B**; note: +1 is the first nucleotide of the start codon), in line with the expected  
30 position of initiating ribosomes waiting to engage in elongation. This feature is a  
31 characteristic of translated bacterial ORFs identified by Ribo-seq (Mohammad et al. 2019; Oh  
32 et al. 2011). In contrast to MNase-generated Ribo-seq libraries in *E. coli* (Mohammad et al.  
33 2019), no differences in the assignment of ribosome position using the 5' end or 3' end

1 mapping approaches were observed (**Fig. S2A** and **S2B**). In the Ribo-seq libraries, we  
2 consistently recovered footprints between 27–33 nt (mean at 30 nt), with enrichment of  
3 ribosome density strongest at the start codon for the 32 nt footprints (**Fig. S2C** and **S2D**).

#### 4 5 **Ribo-seq captures the translome of *S. meliloti* and reveals features at the single gene** 6 **level**

7 By comparing the signals of the Ribo-seq and RNA-seq libraries, the TE (Ribo-seq/total RNA  
8 coverage) can be estimated at a given locus. This method allowed us to derive a genome-wide  
9 estimate of the translome in minimal medium, where 3,758 of the 6,263 annotated coding  
10 sequences (CDS) (60%; GenBank Annotation 2014) had a Ribo-seq signal above the  
11 arbitrarily chosen TE cut-off of  $\geq 0.5$  and RNA-seq and Ribo-seq RPKM of  $\geq 10$  (see **Methods**,  
12 **Fig. 2A**, **Table S6**). In contrast, the ORF prediction tools implemented in HRIBO (Gelhausen  
13 et al. 2021, 2022) detected translation for 2,136 of the 3,758 ORFs (57%), suggesting an  
14 average performance in predicting long translated ORFs in *S. meliloti* (**Fig. 2A**, **Table S6**).

15 Inspection of the TE for different annotated gene classes and untranslated mRNA regions (all  
16 CDS, 5' and 3' UTRs, non-coding RNAs, and sORFs) revealed that annotated ORFs exhibited a  
17 higher mean TE (TE  $\geq 1$ ) compared with non-coding genes, such as housekeeping RNA genes  
18 (hkRNA, e.g., tmRNA, 6S, ffs, *rnpB* and *incA1/2* RNA, mean TE  $< 1$ ) (**Fig. 2B**), again  
19 corroborating the ability of our Ribo-seq data to differentiate between coding and non-coding  
20 genes. The 5' UTR regions of translated mRNAs generally had a mean TE of  $\geq 1$ , which possibly  
21 resulted from protection from RNase I trimming of the -16 nt region upstream of the start  
22 codon by the initiating ribosomes (**Fig. S2**). This feature was particularly prominent in the  
23 leader regions of mRNAs with short 5' UTRs, indicating that they are partially protected from  
24 digestion by initiating ribosomes (**Fig. S3A**). In addition, some 5' UTRs might contain  
25 translated upstream sORFs, such as *trpL* upstream of *trpE* (marked in red in **Fig. 2D**) (Melior  
26 et al. 2020). Although less pronounced than at the start codon, the translation-terminating  
27 ribosome also protects a certain 3' UTR region from RNase digestion (Oh et al. 2011),  
28 explaining the slightly higher mean TE of 3' UTRs (**Fig. 2B**). Furthermore, a few of the 3' UTRs  
29 might also contain translated downstream sORFs (**Fig. S3B**; Dodbele and Wilusz 2020; Wu et  
30 al. 2020), which may explain the slightly higher mean TE of 3' UTRs.

31

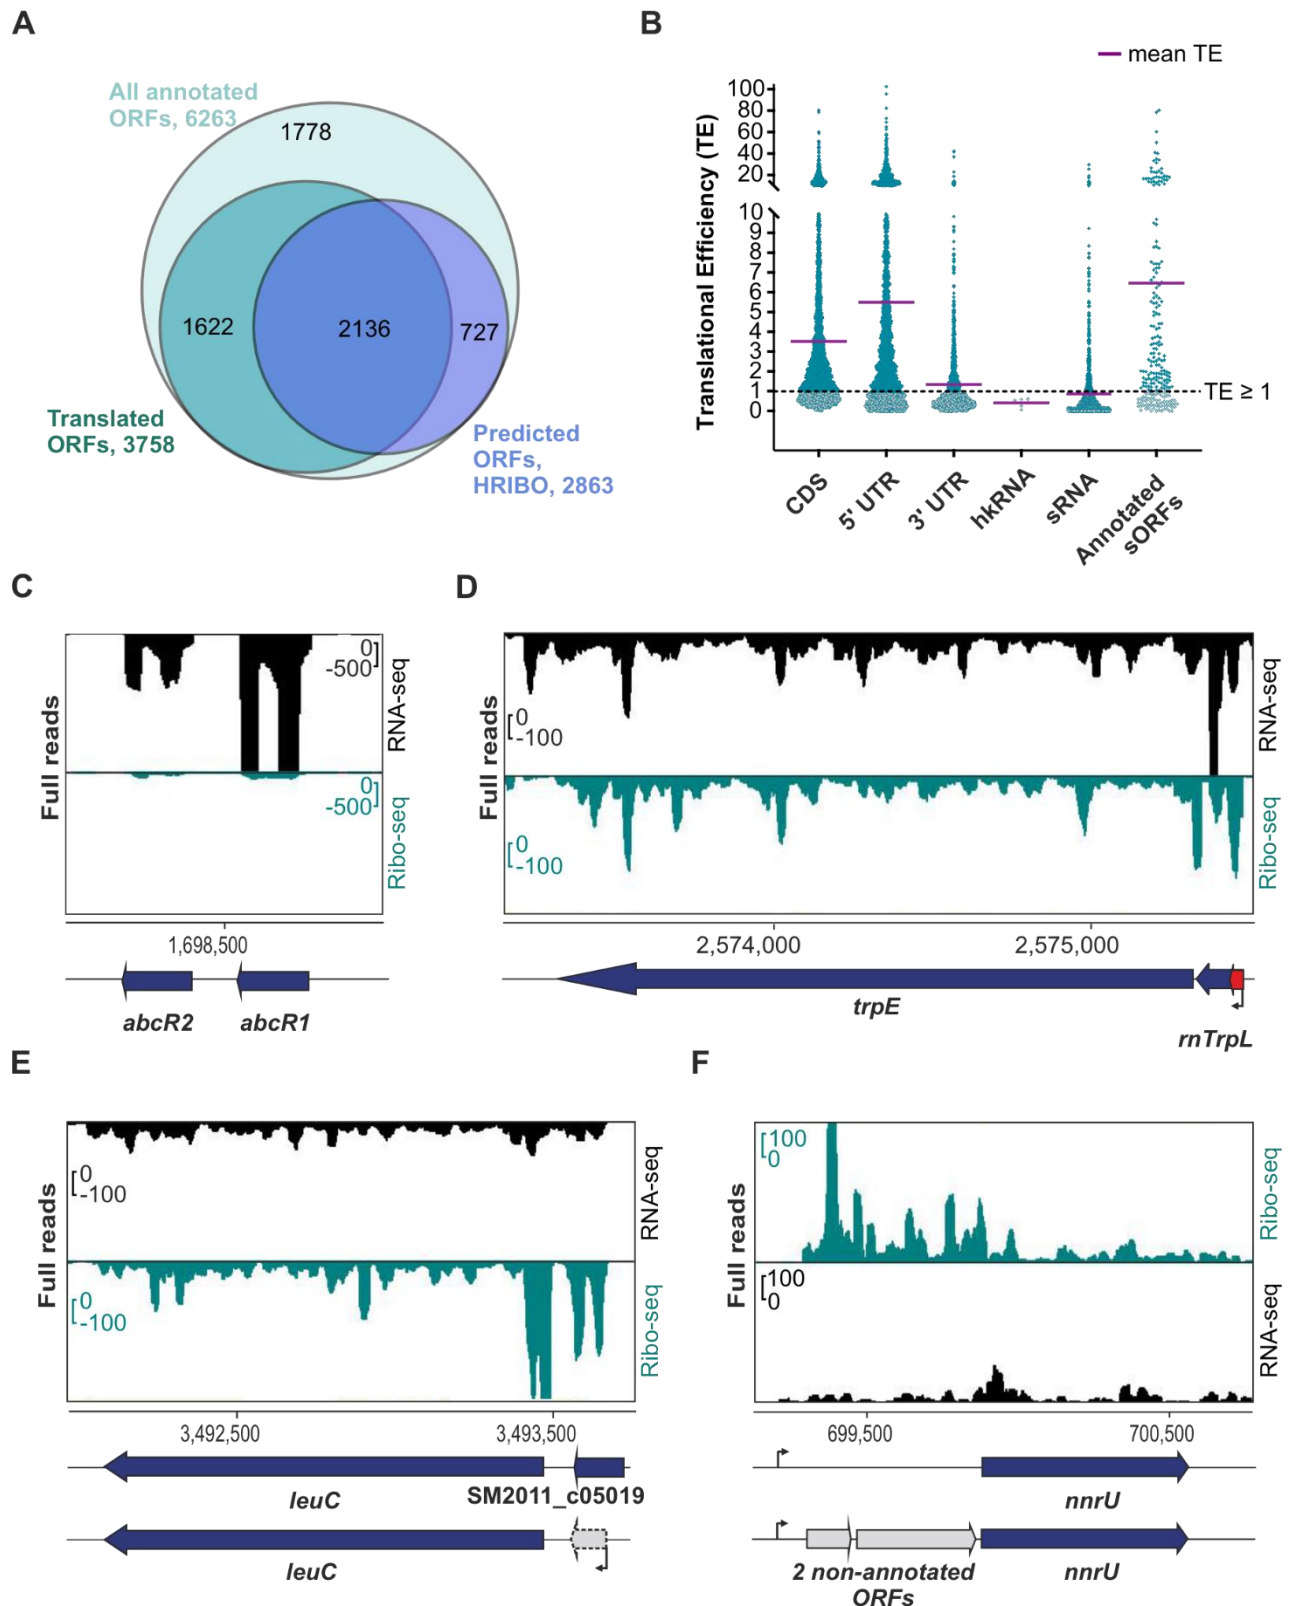

1  
 2 **Figure 2. Ribosome profiling (Ribo-seq) captures the translatoome of *Sinorhizobium meliloti***  
 3 **2011 and reveals some features at the single-gene level. (A)** Comparison of all annotated open  
 4 reading frames (ORFs), annotated translated ORFs detected by Ribo-seq, and ORFs predicted to be  
 5 translated by tools included in the HRIBO pipeline. To detect translation, we used the following  
 6 parameters on the Ribo-seq data: TE of  $\geq 0.5$  and RNA-seq and Ribo-seq RPKM of  $\geq 10$ . The numbers

1 of ORFs per category are shown and represented by area size. Diagrams were prepared with BioVenn  
2 ([www.biovenn.nl](http://www.biovenn.nl)). **(B)** Scatter plot showing global TEs (TE = Ribo-seq/RNA-seq) computed from *S.*  
3 *meliloti* Ribo-seq replicates for all annotated coding sequences (CDS), annotated 5' and 3' UTRs,  
4 annotated housekeeping RNAs (hkRNA), annotated small RNAs (sRNAs) with (putative) regulatory  
5 functions, and annotated sORFs encoding proteins of  $\leq 70$  amino acids (aa). The purple lines indicate  
6 the mean TE for each transcript class. **(C)** Analysis of the two well-characterized sRNAs AbcR1 and  
7 AbcR2 by Ribo-seq. These two sRNAs show read coverage, mostly in the RNA-seq library. **(D)** Ribo-  
8 seq reveals the active translation of the *trpE* leader peptide peTrpL (14 aa, encoded by the leaderless  
9 sORF *trpL* in the 5' UTR (red arrow) and/or by the attenuator sRNA rnTrpL). In addition, the coverage  
10 of the Ribo-seq library shows that the biosynthetic gene *trpE* is translated in minimal medium, as  
11 expected. **(E)** Re-annotation of the annotated sORF SM2011\_c05019 (50 aa). The actual annotation  
12 does not fit the RNA-seq and Ribo-seq read coverages. HRIBO predicts a shorter leaderless sORF (38  
13 aa) that corresponds to the read coverage in both libraries. **(F)** Two ORFs missing from the GenBank  
14 (2014) annotation are revealed by Ribo-seq upstream of the *nnrU* gene related to denitrification.  
15 Genomic locations and coding regions are indicated below the image. Bent arrows indicate  
16 transcription start sites based on (Sallet et al. 2013).

17  
18 Most of the annotated sRNAs had a mean TE of  $< 1$ , indicating that they are in fact non-coding,  
19 such as the sRNAs AbcR1 (TE=0.2) and AbcR2 (TE=0.09) (**Fig. 2C**) (Torres-Quesada et al.  
20 2013). However, some annotated sRNAs had a mean TE of  $\geq 1$ , suggesting that they may be  
21 small mRNAs or dual-function sRNAs (**Fig. S3C**). For example, **Fig. 2D** shows the recently  
22 described dual-function sRNA rnTrpL (TE = 1.16), which corresponds to the tryptophan  
23 attenuator and contains the *trpL* sORF encoding the functional 14 aa leader peptide peTrpL  
24 (Melior et al. 2019; Melior et al. 2021). Since rnTrpL is a small, leaderless mRNA starting with  
25 the AUG of *trpL*, **Fig. 2D** also exemplifies how our Ribo-seq analysis can capture leaderless  
26 translated ORFs. Furthermore, as expected, we detected active translation of the biosynthetic  
27 genes *trpE* and *leuC* under growth in minimal medium lacking tryptophan and leucine (**Fig.**  
28 **2D** and **2E**).

29 Finally, we used our Ribo-seq data to curate the annotation of *S. meliloti*. For example, Ribo-  
30 seq, RNA-seq data, and our computational ORF predictions based on Ribo-seq all indicated  
31 that the start of the sORF SM2011\_c05019 (50 aa) is likely located downstream of the current  
32 annotation, implying a shorter sORF of 38 aa (**Fig. 2E**). Additional sORFs whose annotation  
33 should be adjusted are reported in **Table S7**. Moreover, our data revealed additional ORFs

1 that should be added to the genome annotation. For example, the RNA-seq and Ribo-seq read  
2 coverages indicate active expression (transcription and translation) upstream of the *nnrU*  
3 gene. However, no gene was predicted in this region of the GenBank 2014 annotation.  
4 HRIBO's prediction tools indicated the potential for two non-annotated ORFs encoding 51  
5 and 132 aa proteins upstream of the *nnrU* gene (**Fig. 2F**). The 51 aa ORF is annotated in the  
6 related *Sinorhizobium medicae* and *Ensifer adhaerens*, and in the latter, a homologous 142 aa  
7 ORF is annotated between the 51 aa sORF and *nnrU*. Notably, while both ORFs were contained  
8 in the *S. meliloti* RefSeq 2017 annotation, the 132 aa ORF was removed again from the latest  
9 version (June 2022). This observation underlines the need for and value of integrative  
10 approaches that can capture and consolidate reference genome annotations from different  
11 annotation centers and even from different releases, which can differ substantially. The  
12 iPtgxDB approach (Omasits et al. 2017) represents one strategy to readily capture and  
13 visualize such differences, as we show here and for a number of additional cases below.

14

#### 15 **Ribo-seq reveals translated annotated small proteins in *S. meliloti***

16 Among the 6,263 annotated CDS in the *S. meliloti* 2011 genome (the annotation from  
17 GenBank 2014 has been used in the laboratory as a reference point for several years), 259  
18 (roughly 4%) correspond to SEPs, with sizes ranging between 30 (the smallest annotated  
19 SEP) and 70 aa (**Table S6**). To benchmark our Ribo-seq data for its capacity for global  
20 identification of translated sORFs, we analyzed the Ribo-seq read coverage of these 259  
21 annotated sORFs. By applying the TE of  $\geq 0.5$  and RNA-seq and Ribo-seq RPKM of  $\geq 10$   
22 cut-off criteria, 131 of them were suggested to be translated (**Table S6**). However, we  
23 further included an extensive manual inspection (see **Methods**) of the Ribo-seq read  
24 coverage on top of these cut-offs to derive a very high-confidence dataset of 85 (33%)  
25 translated sORFs (**Fig. 3A, Table S6**).

26 We then used this set of manually curated, translated sORFs as a benchmark sORF data  
27 set to evaluate the performance of two machine learning-based, automated, Ribo-seq-  
28 based ORF prediction tools included in our HRIBO pipeline (Gelhausen et al. 2021, 2022),  
29 REPARATION (Ndah et al. 2017), and DeepRibo (Clauwaert et al. 2019). REPARATION  
30 predicted the translation for 23 of the 85 benchmark sORFs (26%; **Fig. 3A**), even missing  
31 some highly translated sORFs, such as those encoding ribosomal proteins

1 (SM2011\_c04434 encoding 50S ribosomal protein L34, mean TE = 5.47) and proteins with  
 2 housekeeping functions (SM2011\_c04884 encoding the anti-sigma factor, mean TE = 2.02,  
 3 and SM2011\_c03850 encoding the heme exporter D, a cytochrome C-type biogenesis  
 4 protein, mean TE = 0.88). In contrast, DeepRibo predicted translation for 66 of the 85  
 5 benchmark sORFs (78%; **Fig. 3A**), indicating that it performed better in terms of detecting  
 6 translated sORFs from *S. meliloti* Ribo-seq data.

7

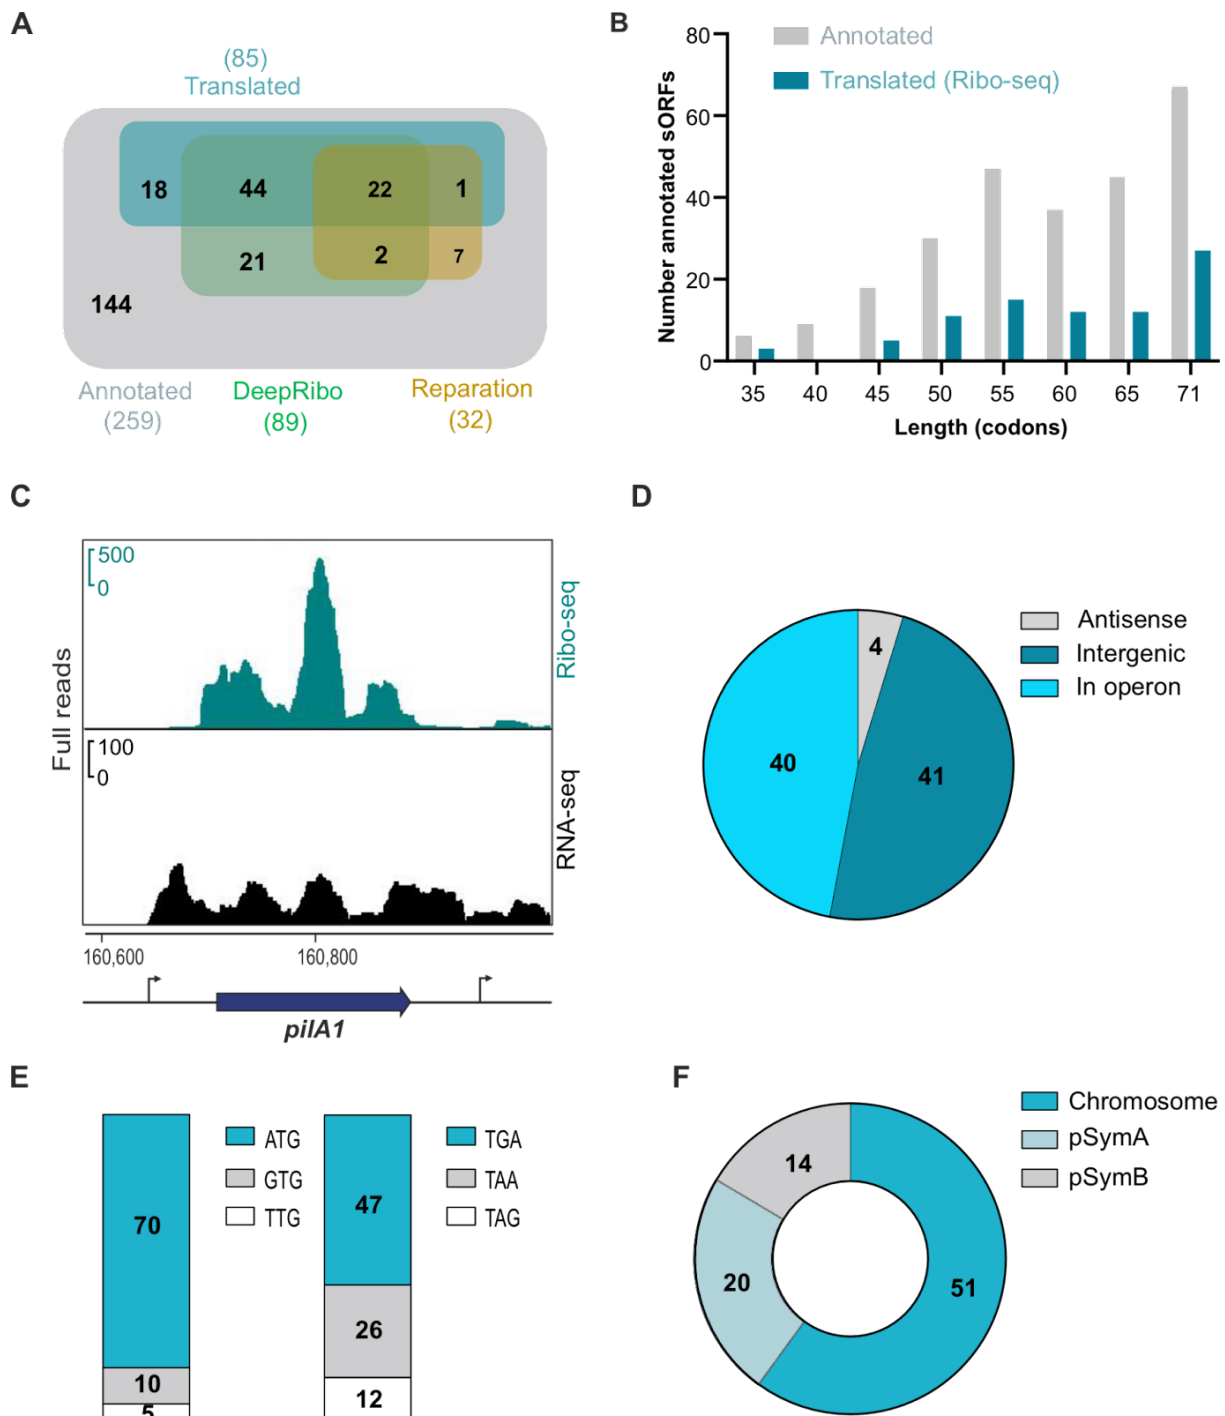

8

1 **Figure 3. Ribo-seq reveals translated annotated small open reading frames (sORFs) in**  
2 ***Sinorhizobium meliloti* 2011. (A)** Venn diagrams showing the overlap between all annotated  
3 sORFs (259 sORFs, GenBank 2014), the sORFs detected as translated by Ribo-seq (benchmark set,  
4 TE of  $\geq 0.5$ , RNA-seq and Ribo-seq RPKM of  $\geq 10$ , and extensive manual curation), and sORFs  
5 predicted by the automated ORF prediction tools Reparation or DeepRibo. **(B)** Histogram showing  
6 the length distribution of the 85 annotated sORFs identified as translated by Ribo-seq in  
7 comparison with the 259 annotated sORFs. **(C)** Integrated genome browser screenshot depicting  
8 reads from the Ribo-seq and RNA-seq libraries for the annotated sORF *pilA1* (60 amino acids,  
9 encoding a pilin subunit). The genomic position and the coding region are indicated below the  
10 image. Bent arrows indicate transcription start sites based on (Sallet et al. 2013). **(D)** Genomic  
11 context for the translated annotated sORFs relative to the annotated neighboring genes. **(E)** Start  
12 (left) and stop (right) codon usage of the translated annotated sORFs. **(F)** Replicon distribution of  
13 the translated annotated sORFs.

14

15 The majority of the 259 annotated (76%) and the subset of 85 translated sORFs (78%)  
16 encode SEPs of  $\geq 50$  aa (**Fig. 3B**), in line with the expected poor annotation of very short  
17 ORFs.

18 **Fig. 3C** shows read coverage from the Ribo-seq and RNA-seq libraries for the sORF  
19 encoding a 60 aa pilin subunit (TE=23.3), which illustrates the successful digestion of  
20 parts of the 5' and 3' UTR regions not covered by ribosomes, thus allowing us to define  
21 sORF borders. In terms of type of genomic location, most of the translated annotated  
22 sORFs are located in intergenic regions and operons, and only a few were found in  
23 antisense transcripts (**Fig. 3D**). The vast majority of the translated annotated sORFs were  
24 found to start with ATG, followed by GTG and TTG. The stop codon preference, although  
25 less pronounced, was TGA > TAA > TAG (**Fig. 3E**). Finally, 60% of the 85 translated  
26 annotated sORFs were located on the chromosome, 23.5% on the megaplasmid pSymA,  
27 and 16.5% on the megaplasmid pSymB (**Fig. 3F**).

28

### 29 **Ribo-seq further expands the small proteome of *S. meliloti***

30 We then aimed to exploit the sensitivity of Ribo-seq to identify potential novel *S. meliloti*  
31 2011 sORFs missing from GenBank annotation (2014) and thereby provide a nearly  
32 complete catalog of its small proteome. The two machine learning-based, automated, Ribo-

1 seq-based ORF prediction tools integrated into the HRIBO pipeline produced a large  
2 number of predictions (approximately 15,000) for potential non-annotated sORFs (**Fig.**  
3 **4A**), as previously shown in other bacterial species (Gelhausen et al. 2022). Given that  
4 these ORF prediction tools neither consider RNA-seq data nor TE but only utilize ribosome  
5 occupancy, we decided to filter the predictions for those with RNA-seq and Ribo-seq RPKM  
6 values of  $\geq 10$  and mean TE of  $\geq 0.5$ . In addition, we applied a stringent cut-off for the  
7 DeepRibo score (see **Methods**) that allowed the ORF candidate ranking, which led to 266  
8 candidates of translated non-annotated sORFs. Manual curation of all candidates based on  
9 their Ribo-seq coverage left us with a list of 54 non-annotated sORFs, which we proposed  
10 with high confidence to be translated during growth of *S. meliloti* in minimal medium (**Fig.**  
11 **4A; Table S7**). Overall, the 54 non-annotated sORFs were shorter than the annotated ones:  
12 33 of them (61%) correspond to SEPs with lengths between 10 and 49 aa, and nine of them  
13 (17%) represent SEPs shorter than 30 aa (the shortest annotated ORF in the *S. meliloti*  
14 annotation). A comparison of the length distribution of the 85 annotated and 54 non-  
15 annotated translated sORFs (**Fig. 4B**) illustrates the potential of Ribo-seq to detect very  
16 short translated sORFs.

17 The 54 non-annotated sORFs are encoded in diverse genomic contexts (**Fig. 4C**): 33%  
18 were located on annotated sRNAs, suggesting that these sRNAs are small mRNAs or dual-  
19 function sRNAs, 26% were in the intergenic regions, thus defining small mRNAs, and 20%  
20 were in the 5' UTRs and may correspond to regulatory upstream ORFs (Evguenieva-  
21 Hackenberg 2022). Only a few were located in 3' UTRs, on antisense transcripts and in an  
22 operon (**Fig. 4C**). Moreover, the majority of the 54 sORFs (63%) were located in the  
23 chromosome, 22% on pSymA, and 15% on pSymB (**Fig. 4D**), a distribution comparable to  
24 that of the annotated sORFs (**Fig. 3F**). Similar to the annotated sORFs, ATG was also the  
25 preferred start codon among the 54 non-annotated translated sORFs, and only five and  
26 four sORFs started with GTG or TTG, respectively; their stop codon preference was also  
27 similar to that of the annotated sORFs (**Table S6**). Importantly, as the iPtgxDB integrates  
28 and consolidates different reference genome annotations and various predictions, we  
29 could readily deduce that 11 of the 54 translated sORFs were contained in the 2017  
30 RefSeq annotation, precisely matching their predicted start and stop codons (**Table S7**).  
31 Five candidates matched a RefSeq annotation, but they were shorter. One candidate  
32 matched the stop but was only 1 aa longer than the RefSeq annotation. Finally, three  
33 candidates matched a GenBank stop codon, but they were shorter than annotated (one of



1 which was in fact again removed in the RefSeq annotation). In summary, Ribo-seq  
 2 uncovered 37 translated sORF candidates that were novel compared to both in GenBank  
 3 2014 and RefSeq 2017 annotations (**Table S7**).

4

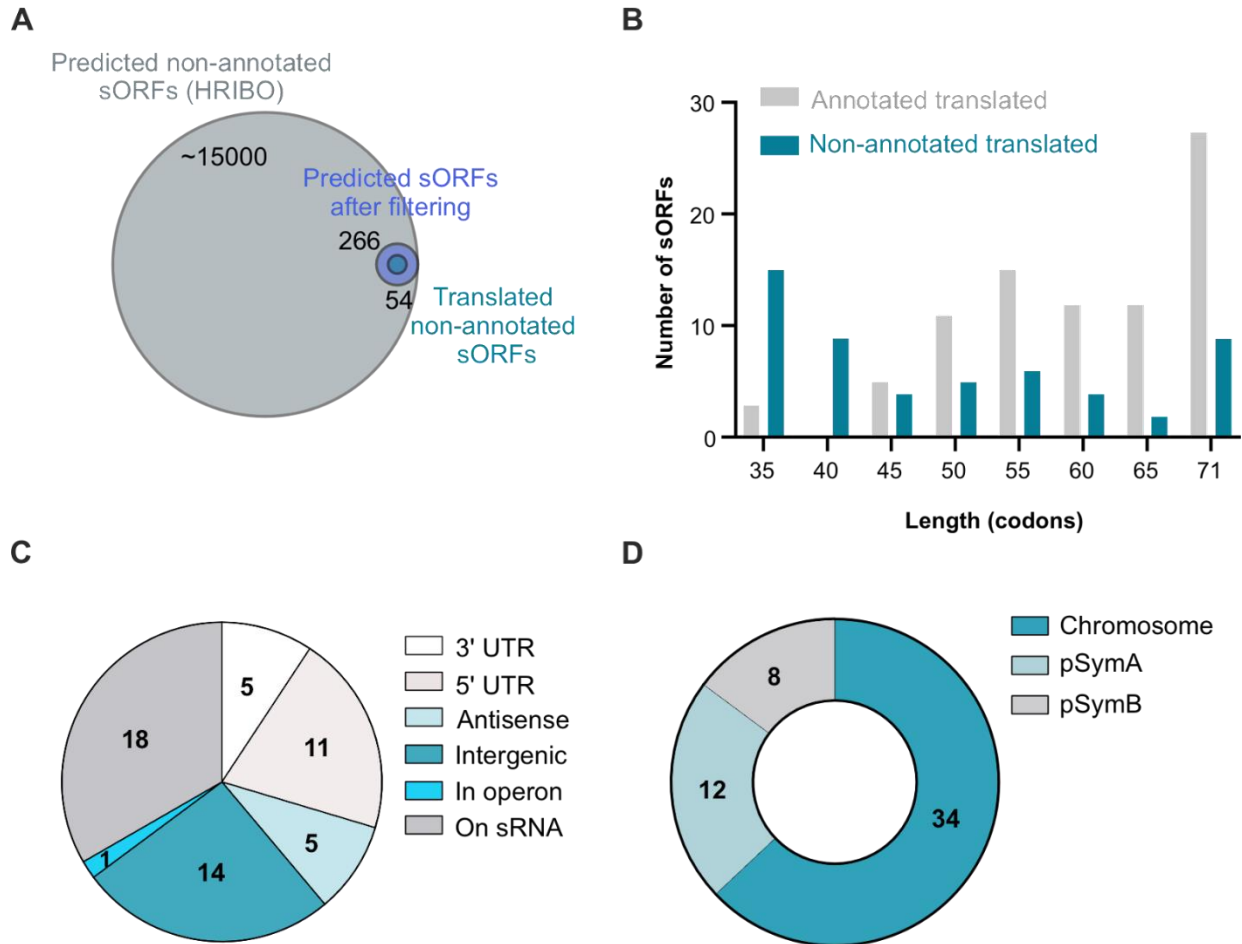

5

6 **Figure 4. Ribo-seq uncovers a repertoire of small open reading frames (sORFs) missing**  
 7 **from the *Sinorhizobium meliloti* 2011 genome annotation. (A)** sORF predictions from HRIBO  
 8 included a high number of potential non-annotated sORFs (approximately 15,000). These sORFs  
 9 were first filtered (TE of  $\geq 0.5$ , RNA-seq and Ribo-seq RPKM of  $\geq 10$ , DeepRibo score of  $> -0.5$ )  
 10 to generate a set of 266 translated sORF candidates that were additionally manually curated by  
 11 inspection of the Ribo-seq read coverage in a genome browser. Overall, 54 high-confidence non-  
 12 annotated sORFs displayed active translation during growth in minimal medium. A Venn diagram  
 13 shows the respective number of proteins from each category (scaled with area size). Diagrams  
 14 were prepared with BioVenn ([www.biovenn.nl](http://www.biovenn.nl)). **(B)** Histogram showing the length distribution  
 15 of the 54 non-annotated versus the 85 annotated sORFs identified as translated by Ribo-seq. **(C)**  
 16 Genomic context of the translated non-annotated sORFs. **(D)** Replicon distribution of the  
 17 translated non-annotated sORFs.

18

## 1 Both standard and small custom iPtgxDBs informed by Ribo-seq data facilitate novel 2 SEP identification by MS

3 To validate sORF translation and identify novel SEPs of *S. meliloti* 2011, we then conducted  
4 MS-based proteomics using experimental strategies to increase the coverage of the MS-  
5 detectable small proteome and two search DBs. Cells were cultured either in minimal GMS  
6 medium (same as for Ribo-seq) or in rich TY medium, and three complementary sample  
7 preparation approaches were used: 1) tryptic in-solution digest of all proteins (a standard  
8 proteomics approach), 2) solid phase enrichment (SPE) of small proteins with subsequent  
9 Lys-C digestion, and 3) SPE of small proteins without subsequent digestion (**Fig. 5A**).  
10 Approaches 2 and 3 can identify SEPs whose peptides are not within the detectable range  
11 (approximately 7 aa to 40 aa) upon a tryptic digest (Tyanova et al. 2016).

12 For the DB searches, we first relied on a standard (full) iPtgxDB (Omasits et al. 2017) that  
13 hierarchically integrates reference genome annotations, *ab initio* gene predictions, and *in*  
14 *silico* ORF predictions (see **Methods**). The overlap and differences of all annotation sources  
15 were captured and consolidated in a composite gene identifier. Moreover, a large but  
16 minimally redundant protein search DB (for more details, see  
17 <https://iptgxdb.expasy.org/creating iptgxdb/>) is created, as well as a GFF that allows  
18 researchers to overlay experimental evidence, such as RNA-seq, Ribo-seq, or proteomics data.  
19 Individual iPtgxDBs must be prepared for different proteases (see **Methods**). For trypsin, the  
20 standard iPtgxDB contained close to 160k protein entries of approximately 103k annotation  
21 clusters (**Table S3.1**), that is, genomic loci that share the stop codon but have different  
22 predicted protein start sites. Approximately 92% of the peptides unambiguously identify one  
23 protein entry, which are called class 1a peptides that facilitate downstream data analysis and  
24 allow to swiftly identify novel proteoforms or SEPs. Although standard iPtgxDBs are very  
25 large, when combined with stringent FDR filtering, they have provided convincing results in  
26 the past, that is, for the identification of novel SEPs that withstood independent validation  
27 efforts (Omasits et al. 2017; Melior et al. 2020; Bartel et al. 2020). However, as large DBs  
28 inflate the search space, they complicate protein inference and FDR estimation, resulting in a  
29 large likelihood of a random hit, especially for SEPs (Fancello and Burger 2022; Nesvizhskii  
30 2010). Importantly, the 266 top Ribo-seq-implied novel candidates (**Fig. 4A**) allowed us to  
31 explore whether a much smaller custom iPtgxDB may provide additional value for the  
32 identification of annotated or novel SEPs. Adding these 266 candidates to the three reference

1 genome annotations (RefSeq, GenBank, Genoscope) and the Prodigal *ab initio* gene  
 2 predictions resulted in a 20-fold smaller custom iPtgxDB (**Fig. 5A**) (approximately 8,000  
 3 protein entries in 7,300 annotation clusters), with a higher percentage of class 1a peptides  
 4 (nearly 98%; **Table S3.3**).

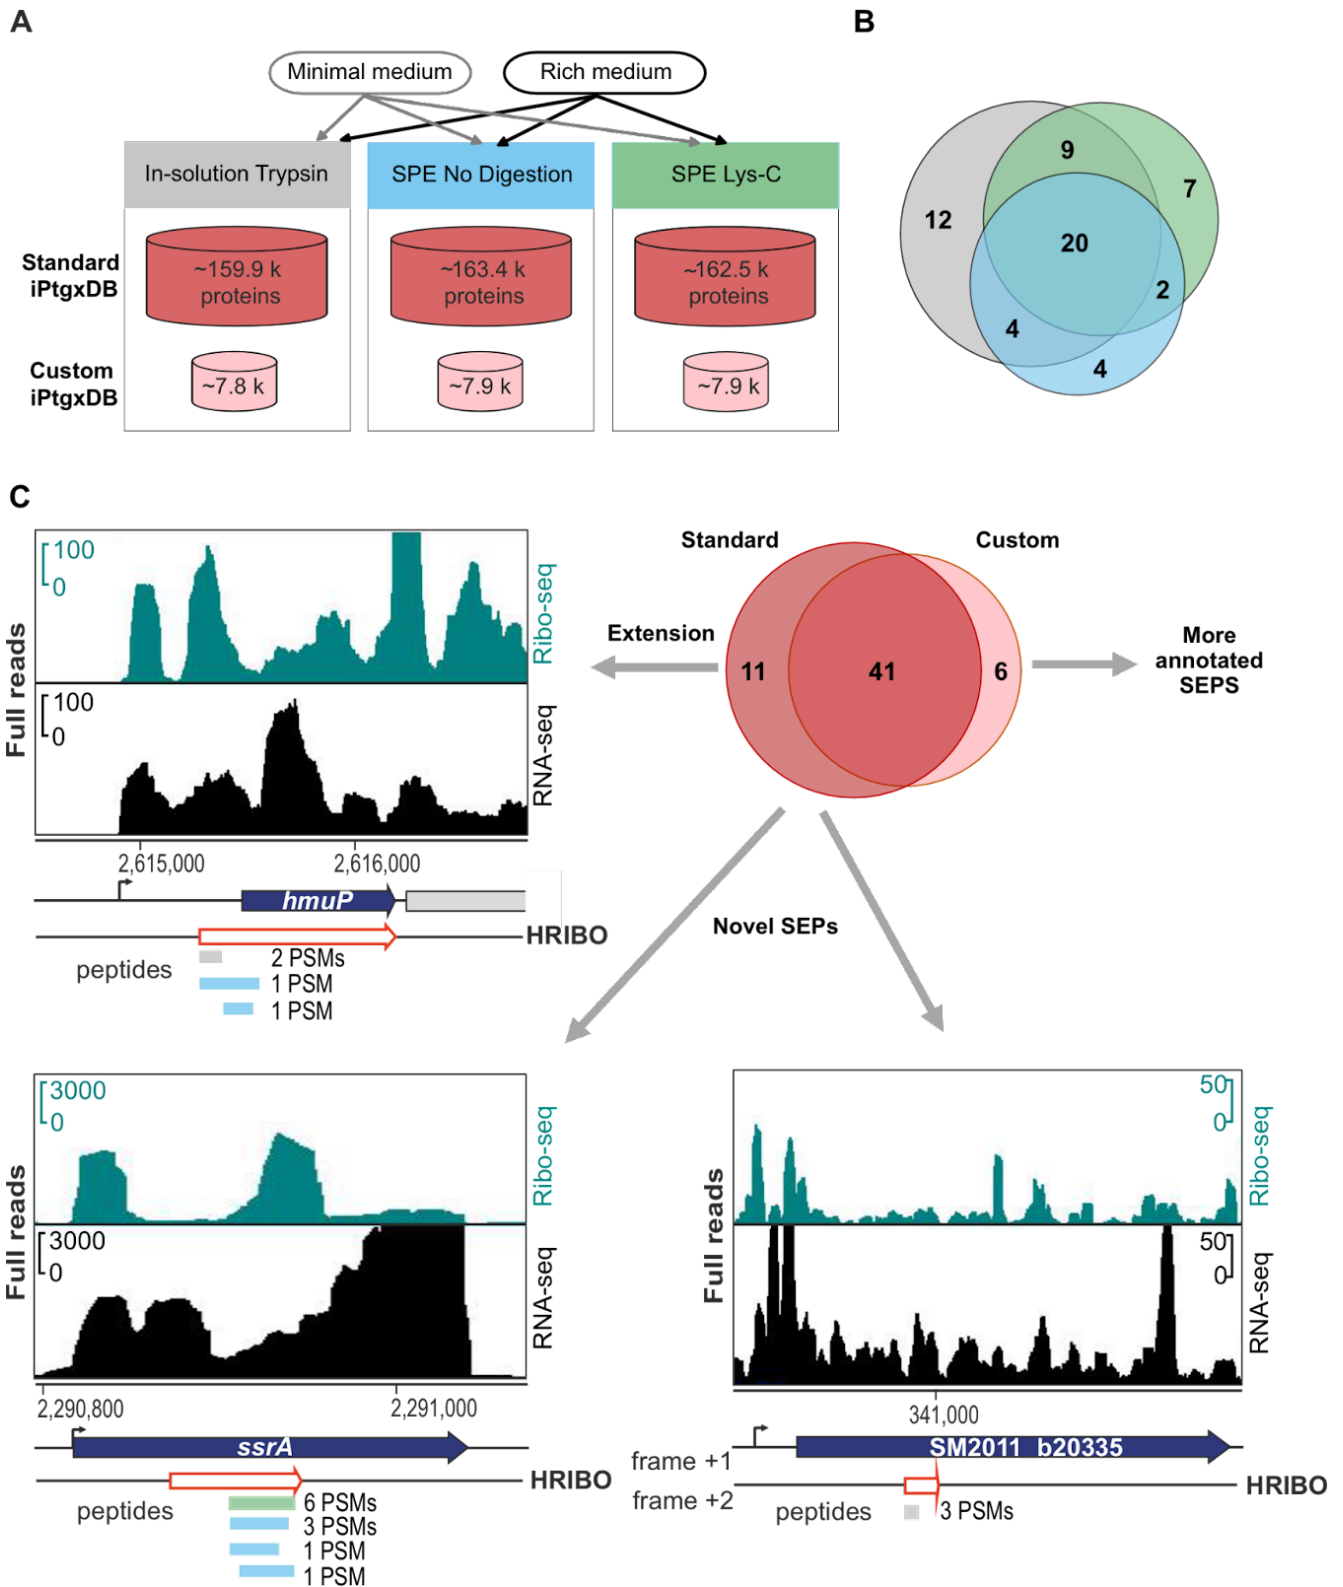

5

1 **Figure 5. Mass spectrometry-based identification of known and novel small open reading**  
2 **frame-encoded proteins (SEPs).** (A) Experimental set-up for the proteomics analyses. Bacteria  
3 were grown in minimal and rich media, and protein extracts were further processed with tryptic in-  
4 solution digest (gray), solid-phase enrichment (SPE) of small proteins with subsequent Lys-C  
5 digestion (green), or without further digestion (blue). (B) Overlap of the identified SEPs by  
6 experimental approach; trypsin identified 45 SEPs; compared with the trypsin approach, Lys-C  
7 identified 38 SEPs (nine novel, 24%), and the approach without digestion found 30 SEPs (six novel,  
8 20%). (C) Novel/unique identifications uncovered by the standard integrated proteogenomic search  
9 databases (iPtgxDB) and the small custom iPtgxDB. Standard iPtgxDB: Three peptides imply a 14 aa  
10 longer proteoform (60 aa) for HmuP than annotated; four peptides of the tmRNA-encoded proteolysis  
11 tag were identified; one peptide (3 peptide spectrum matches [PSMs]) implied a novel SEP (34 aa)  
12 internal to the genomic region that also encodes SM2011\_b20335 but in a different frame. Spectra  
13 identifying these peptides are shown in **Fig. S5**. These identifications were also predicted by HRIBO  
14 based on Ribo-seq. Finally, six annotated proteins (GenBank 2014 and/or RefSeq 2017) were  
15 identified only in the search against the small custom iPtgxDB, as they did not accumulate enough  
16 spectral evidence in the search against the standard iPtgxDB (**Table S4**).

17  
18 The acquired MS-spectra were searched against the standard and small iPtgxDBs, and the  
19 results were compiled and stringently filtered, requiring more PSM evidence (see Methods)  
20 for *ab initio* and *in silico* predictions (Varadarajan et al. 2020a; Varadarajan et al. 2020b).  
21 Overall, more than 1,200 annotated proteins were detected at an estimated protein FDR of  
22 approximately 1%. The SPE-based small protein enrichment steps uniquely identified 160 of  
23 these proteins (**Fig. S4A**). Notably, the search against the small custom DB accounted for 112  
24 unique identifications (**Fig. S4B**), presumably due to improved search statistics. The MS-  
25 identified proteins included 58 SEPs, with  $\leq 70$  aa, 47 of which were annotated (GenBank  
26 2014 and/or Refseq 2017) (**Table S4**). Similar to the overall results, the two SPE approaches  
27 also added unique SEPs: while 45 of the 58 MS-detected SEPs were identified with standard  
28 trypsin-based digestion, 13 SEPs were uniquely identified after processing the samples with  
29 SPE and either a Lys-C digest (9 of 38 not covered by trypsin) or no proteolytic digest (6 of  
30 30 not covered by trypsin) (**Fig. 5B**). Most MS-identified SEPs were between 60 and 70 aa  
31 long (67%), and the smallest detected SEP was 20 aa long. They include abundantly expressed  
32 proteins (the cold shock proteins RS25125 and RS00515, and RS31025, a 50S ribosomal  
33 protein L32) (**Table S4**) down to candidates identified by only 2 PSMs, such as a 59 aa  
34 hypothetical protein, which we refer to as SEP7 (see next section). Among the 85 GenBank-

1 annotated SEPs identified with high confidence, as translated by Ribo-seq (**Fig. 3A**), 31 were  
2 identified by MS. Among the 54 SEPs missing from the GenBank annotation and identified as  
3 translated by Ribo-seq (**Fig. 4A**), five were identified by MS, and those are present in the  
4 Refseq 2017 annotation (**Table S4**).

5 Importantly, both searches added unique identifications. The search versus the full iPtgxDB  
6 added 11 potential novel SEPs or longer proteoforms than annotated, which were *in silico*  
7 predictions that were excluded from the small custom iPtgxDB. A 14 aa longer proteoform of  
8 HmuP was identified by three peptides with 4 PSMs (**Fig. S5A**). Here, when manually  
9 inspecting the Ribo-seq data, it perfectly agreed with the extension of the 46 aa GenBank  
10 annotation (**Fig. 5C**). This finding exemplifies how proteomics and Ribo-seq jointly identify a  
11 novel proteoform. Furthermore, the tmRNA-encoded 12 aa proteolysis tag peptide was  
12 uniquely identified, which marks incompletely translated proteins for degradation (Karzai et  
13 al. 2000) (**Fig. 5C**). The tag peptide was identified as a C-terminal part of an *in silico* predicted  
14 23 aa SEP included in the standard iPtgxDB. It was only detected in the minimal medium by  
15 four peptides: one in the Lys-C digest and three from the search without protease (**Fig. 5C**  
16 and **S5B**). Mutation of the start codon of the 23 aa sORF had no effect on the translation of the  
17 proteolysis tag peptide, in line with the mechanism proposed for this split tmRNA (Ulvé et al.  
18 2007; Keiler et al. 2000) (**Fig. S6**). An example of a completely novel 34 aa SEP is shown in  
19 the third panel of **Fig. 5C** (see also **Fig. S5C**); it is located in a genomic region that harbors an  
20 annotated CDS and is translated in a different frame. The novel sORF has Ribo-seq support  
21 (TE 0.4) but did not pass our stringent Ribo-seq cut-offs. Notably, the search against the small  
22 custom iPtgxDB added six unique SEP identifications (again, due to better search statistics)  
23 (**Fig. 5C**). Four of them were also among the 85 GenBank-annotated SEPs identified by Ribo-  
24 seq data (RS33030, RS33620, RS33980, and a6027), lending independent support for their  
25 expression (**Table S4**). RS33620 belongs to the arginine-rich DUF1127 family of proteins, the  
26 members of which are involved in phosphate and carbon metabolism in *Agrobacterium*  
27 *tumefaciens* (Kraus et al. 2020), and in RNA maturation and turnover in *Rhodobacter*  
28 (Grützner et al. 2021). In addition, the abovementioned RefSeq-annotated SEP7 was  
29 identified (**Fig. S5D**). Two other SEPs (one of them novel) were identified with only 1 PSM  
30 (**Fig. S5E and S5F**), which was below our threshold, but had strong Ribo-seq support (SEP1,  
31 SEP20; see next section).

32

## 1 Validation of a subset of Ribo-seq-implied small proteins by Western blot analysis

2 Since out of the 54 high-confidence Ribo-seq-implied sORFs that were not contained in  
3 the GenBank annotation (2014) only five were detected with at least 2 PSMs in the MS  
4 analysis (**Table S4**), we attempted validation by epitope tagging and Western blot  
5 analysis (**Fig. 6**). Nineteen sORFs were selected that i) cover a broad range of TE values,  
6 ii) start with one of the three main start codons (ATG: 16 sORFs, GTG: two sORFs, or TTG:  
7 one sORF), and iii) were either added in the RefSeq 2017 annotation (five sORFs) or were  
8 novel with respect to these two annotations (14 sORFs). The corresponding proteins were  
9 designated SEP1 to SEP19 (**Table S4**). They included three of the candidates that were  
10 also detected by MS (SEP7: 2 PSMs; SEP 10: 59 PSMs; SEP17: 29 PSMs). SEP1 was only  
11 identified by 1 PSM, that is, below the threshold (**Table S4; Fig. S5E**), but with strong  
12 Ribo-seq support (highest TE among the 54 high-confidence Ribo-seq candidates; **Table**  
13 **S7**). Moreover, three SEP candidates below 30 aa (SEP1, SEP3, and SEP6) and four  
14 candidates with a predicted transmembrane helix (TMH) (SEP4, SEP6, SEP13, and SEP16;  
15 **Table S4**) were analyzed. As a 20th candidate (SEP20), we included a conserved  
16 annotated sORF located in the cytochrome C oxidase cluster *ctaCDBGE* between *ctaB* and  
17 *ctaG* (GenBank annotation 2014), which also contains a predicted TMH. SEP20 was  
18 identified by 1 PSM in the MS analysis (**Fig. S5F**) and did not pass the stringent HRIBO  
19 criteria for translated candidate sORFs (**Table S3**, TE = 6.99, RPKM of < 10 in replicate 1)  
20 but showed strong read coverage in the Ribo-seq library (**Table S6**).

21 Each sORF was cloned together with its -15 nt 5' UTR region, thus containing its putative  
22 ribosome binding site in frame to the SPA-tag encoding sequence into plasmid pSW2 (**Fig.**  
23 **6A** and **Fig. S1**). Transcription of the sORF::*spa* fusion is under the control of a *S. meliloti*  
24 *sinI* promoter ( $P_{sinI}$ ) of moderate strength, which is constitutively active (Charoenpanich et  
25 al. 2013). Thus, the detection of a SEP-SPA fusion protein by Western blot analysis would  
26 indicate sORF translation. The Western blot analysis of crude lysates of cultures grown in  
27 minimal medium using FLAG-directed antibodies revealed signals for 15 of the 20  
28 candidates, including SEP20 (see **Fig. 6B-6G**). For the 12 candidates, one band consistent  
29 with their predicted SEP length was detected. For SEP1 and SEP5, on top of the expected  
30 SEP-SPA bands, slow migrating bands at approximately 25 kDa (see asterisks in **Fig. 6E**)  
31 were detected, which probably corresponded to a non-specific signal, as they were also  
32 detected in some EVC samples after lysate fractionation (**Fig. S7**).

**A**

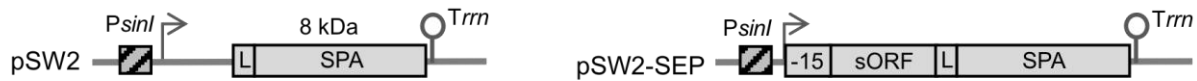

**B**

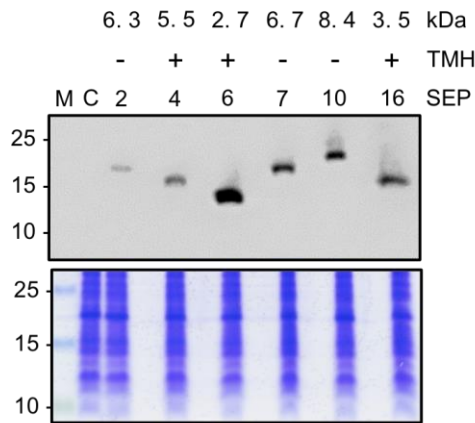

**C**

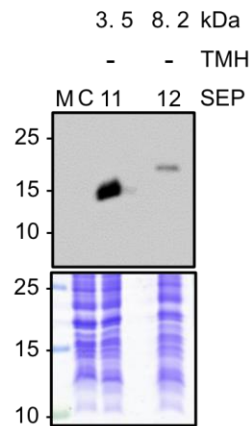

**D**

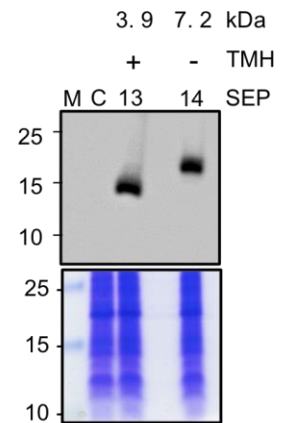

**E**

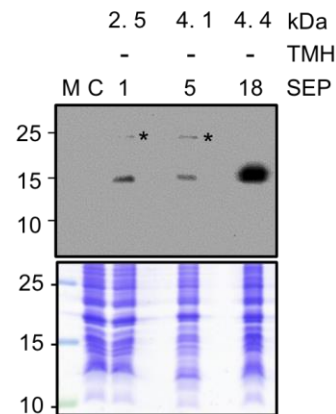

**F**

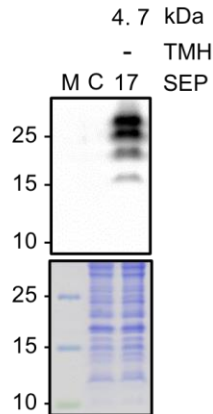

**G**

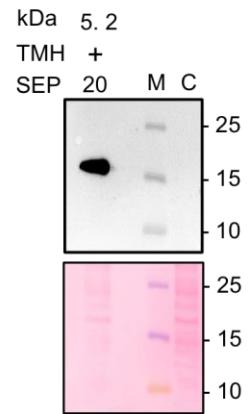

1  
2 **Figure 6. Detection of 15 sequential peptide affinity (SPA)-tagged small open reading**  
3 **frame-encoded proteins (SEPs) in *Sinorhizobium meliloti* crude lysates.** (A) Schematic  
4 representation of the empty plasmid pSW2 (contains no promoter and no ribosome-binding site  
5 upstream of the linker [L] and SPA-encoding sequence) and a pSW2-SEP plasmid for the analysis  
6 of sORF translation. The constitutive *PsinI* promoter (hatched box), the corresponding TSS (flexed  
7 arrow), the sORF coding sequence with its -15-nt-long region, the SPA-tag (with its molecular size  
8 indicated) preceded by a linker (L) (gray boxes), and the *Trm* terminator (hairpin) are depicted.  
9 **(B) to (F)** Western blot analysis of crude lysates (upper panels) and the corresponding  
10 Coomassie-stained gels, and **(G)** corresponding Ponceau-stained membrane for selected SEPs.  
11 Monoclonal FLAG-directed antibodies were used. Migration of marker proteins (in kDa) is shown  
12 on the left side. \* Unspecific signal. Above the panels, the numbers of the analyzed SEP protein  
13 (see **Table S7**), the presence (+) or absence (-) of a predicted TMH, and the molecular size (in

1 kDa) of the SEP without the SPA tag are given. M: protein marker. C: empty vector control, lysate  
2 from a strain containing pSW2.

3

4 The bands of the tagged SEP1 and SEP5 ran similarly, although SEP1 is smaller than SEP5,  
5 as indicated above the panel (**Fig. 6E**). Probably, the aberrant migration of SEP1 is due to  
6 its acidic aa composition (pI of 4.18) (Guan et al. 2015). SEP17 showed multiple bands,  
7 with a weak and fast migrating band at approximately 15 kDa, which probably  
8 corresponds to the monomeric SEP17-SPA protein, and three strong and slow migrating  
9 bands, which could indicate protein oligomerization (**Fig. 6F**). Overall, the translation of  
10 SEPs with alternative start codons, that is, GTG (SEP10 and SEP14) and TTG (SEP7), and  
11 of the five candidates missed in the GenBank (2014) annotation but included by Refseq  
12 (2017) (SEPs Nr. 4, 7, 10, 17, and 18), was validated. Importantly, this analysis confirmed  
13 the translation of six novel SEPs (SEPs Nr. 1, 6, 11, 13, 14, and 16), including two of the  
14 three SEP candidates shorter than 30 aa. Finally, our observation that 11 (out of 16) sORFs  
15 without MS support but with high confidence Ribo-seq data were validated in the Western  
16 blot analysis shows the power of Ribo-seq to detect novel translated sORFs.

17 Since the analysis of exclusive or predominant subcellular localization is valuable for  
18 linking hypothetical proteins without any annotation to some potential function  
19 (Stekhoven et al. 2014), we decided to investigate the subcellular localization of the  
20 validated SPA-tagged SEPs by Western blot analysis of the supernatant (S100) and pellet  
21 (P100) fractions (see Methods) (**Fig. S7**). As expected, the predicted TMH-containing  
22 proteins SEP4, SEP6, SEP13, SEP16, and SEP20 were detected exclusively or  
23 predominantly in P100, which contains ribosomes and membranes, whereas the  
24 predicted cytoplasmic proteins SEP5 and SEP12 were detected exclusively in the S100  
25 fraction (**Fig. S7**). The remaining eight SEPs were detected exclusively or partially in the  
26 P100 fraction, suggesting that they could be associated with membrane complexes or  
27 ribosomes (SEP10 and SEP18 show similarities to the ribosomal proteins S21 and L7/12)  
28 or be prone to aggregation in their recombinant, tagged form.

29

30



## 1 Conservation and potential functions of *S. meliloti* novel small proteins

2 As described above, we detected the translation of 48 sORFs missing in the GenBank 2014  
3 and Refseq 2017 annotations (37 identified by Ribo-seq and additional 11 by MS), which  
4 we refer to as novel. Since conserved SEPs are likely to be functional, we used tBLASTn  
5 (Gertz et al. 2006) to examine the conservation of the proteins encoded by the 48 novel  
6 sORFs (**Fig. 7; Table S8**). The tBLASTn searches were conducted in bacteria with  
7 parameters previously established to identify conserved bacterial sORFs (Allen et al.  
8 2014) (see **Methods**). We found a wide range of conservation, from an sORF detected in  
9 only four *S. meliloti* strains overall, to sORFs conserved at different higher taxonomic  
10 levels, to highly conserved sORFs present in different bacterial phyla (**Fig. 7**). Among the  
11 14 sORFs encoding SEPs with < 30 aa (excluding the tmRNA sORF64), four are conserved  
12 beyond *S. meliloti*. One of the most widely conserved novel SEPs is a 64-aa-long small  
13 protein detected only by MS (sORF61 in **Fig. 7**). It was identified as a product of an *in silico*  
14 predicted sORF, with 3 PSMs in lysates from MM cultures (**Fig. S5G; Table S4**). However,  
15 no expression at the level of RNA was detected at its locus, possibly suggesting high  
16 protein stability. sORF61 has homologs in several bacterial phyla and multiple paralogs,  
17 with a maximal aa sequence identity of 64% on each replicon in *S. meliloti* 2011. Despite  
18 its wide distribution and strong conservation, its function is unknown. Overall, excluding  
19 the tmRNA, we detected seven sORFs conserved beyond the family *Rhizobiaceae*,  
20 suggesting that the corresponding SEPs may have important general functions.

21 Furthermore, we used TMHMM (Krogh et al. 2001) and PSORTb (Yu et al. 2010) to predict  
22 the presence of transmembrane helices and the subcellular localization of the 48 novel  
23 SEPs. Localization in the cytoplasmic membrane was predicted for seven SEPs using at  
24 least one of the tools (**Fig. 7; Table S8**). Among them are the Ribo-seq-identified and  
25 Western blot analysis-validated SEP6 (prediction by both TMHMM and PSORTb) and  
26 SEP16 (prediction by TMHMM only), which were detected with strong signals  
27 predominantly in the P100 fraction (see **Fig. S7**). The corresponding sORF6 and sORF16  
28 are conserved in *Hyphomicrobiales* (**Fig. 7**). No proteins with predicted membrane  
29 localization were found among the 11 MS-detected SEPs (**Fig. 7**). Notably, two of the 48  
30 novel SEPs harbor a predicted SpII cleavage site and are thus probably lipoproteins (**Fig.**  
31 **7**). Lipoproteins play important roles in physiology, signaling, cell envelope structure,  
32 virulence, and antibiotic resistance (Kovacs-Simon et al. 2011); however, as we had

- 1 previously reported, they are often missed in prokaryotic genome annotations (Omasits
- 2 et al. 2017).

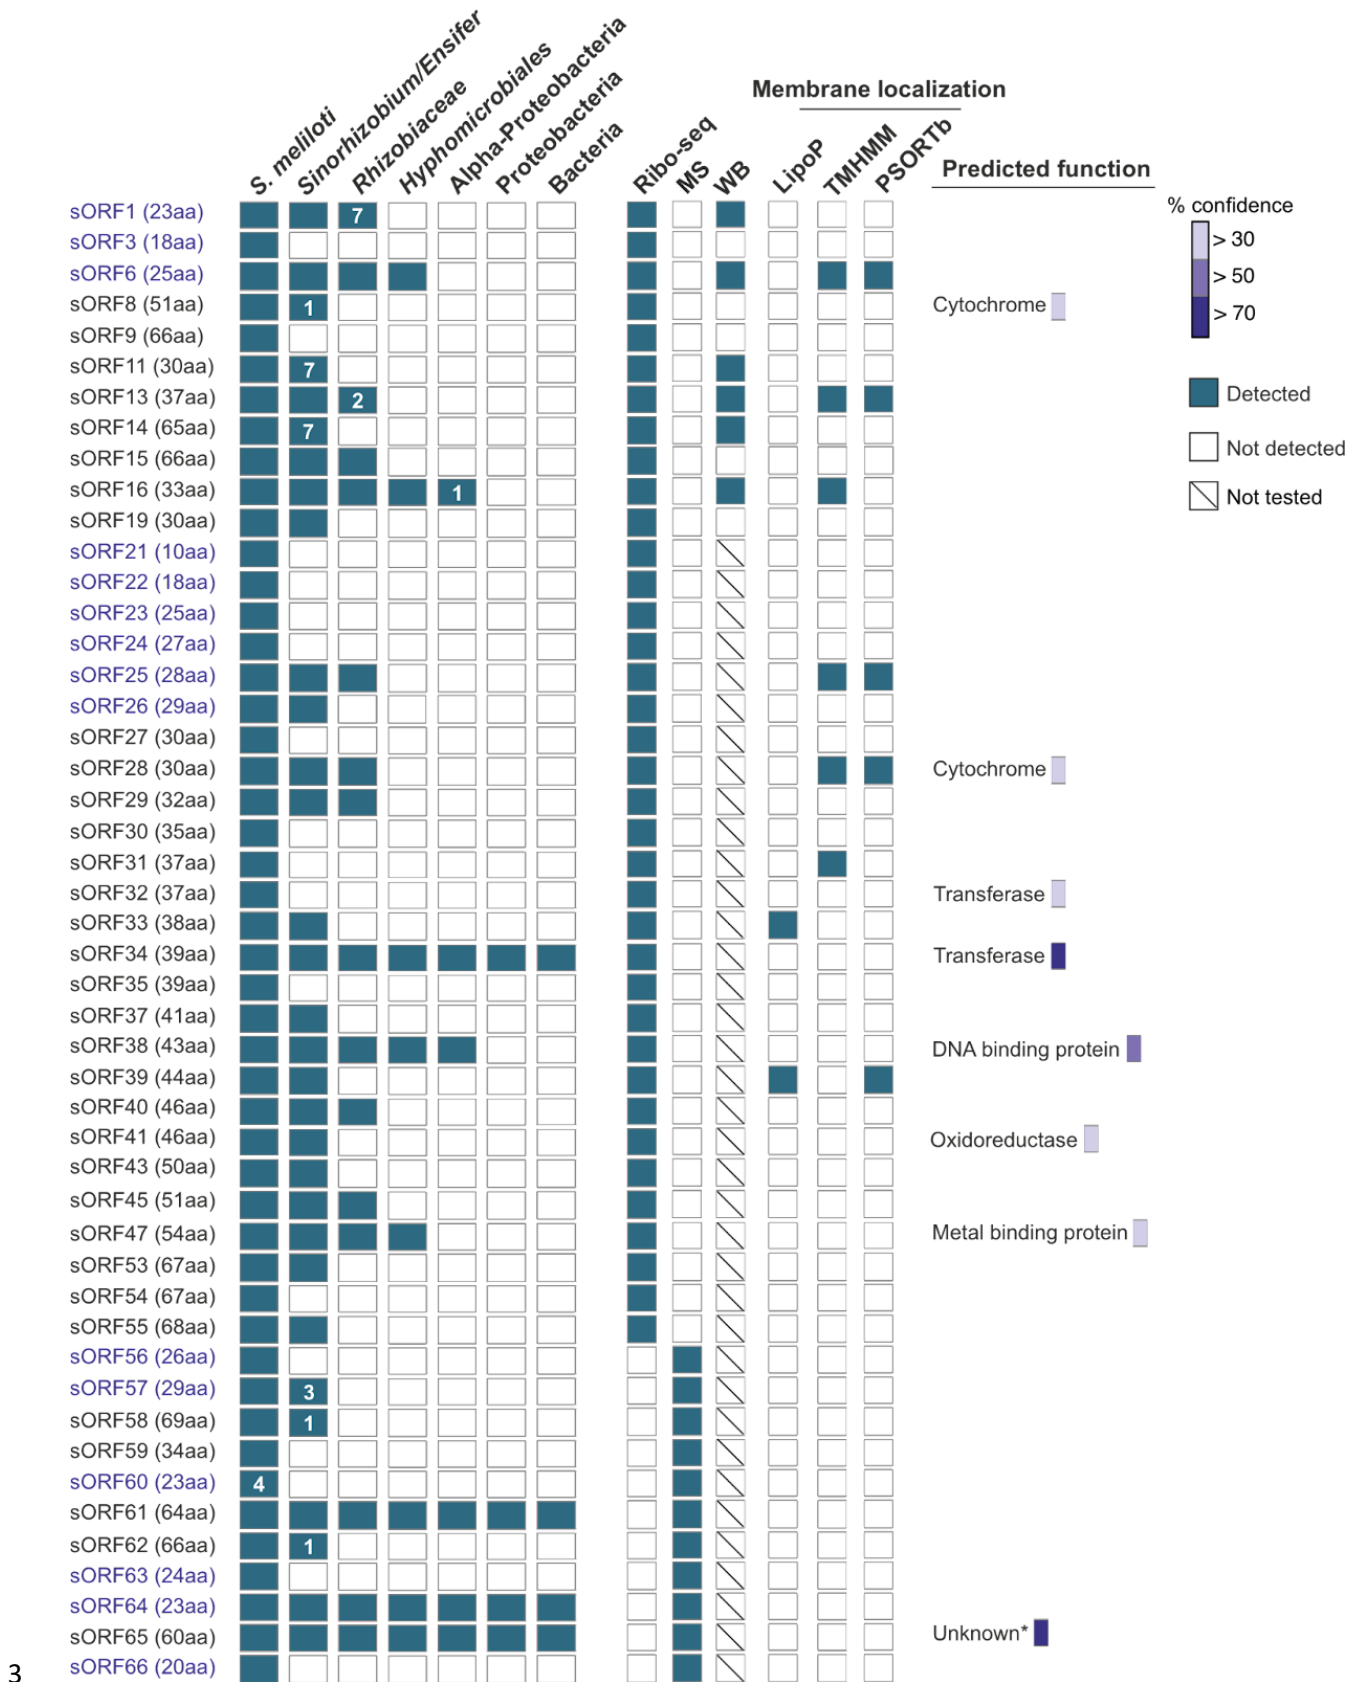

3

1 **Figure 7. Conservation analysis and functional prediction for 48 novel small open reading**  
2 **frames (sORFs) of *Sinorhizobium meliloti* 2011.** The conservation analysis was conducted using  
3 tBLASTn. The respective hits (see methods for parameters and cutoffs) are broadly summarized at  
4 the level of different taxonomic groups. The number of species outside the lower taxonomic unit,  
5 which harbors a hit, is given, if at < 10. In addition, the method by which the respective sORF was  
6 detected or confirmed is shown (Ribo-seq: ribosome profiling, MS: proteomics, WB: Western blot), as  
7 well as the results of predictions for membrane localization (by TMHMM and PSORTb), signal peptide  
8 II cleavage sites of lipoproteins (by LipoP), and function (by Phyre2; only hits with confidence levels  
9 greater than 30% are shown). sORF1 to sORF55 are a subset of the 57 Ribo-seq-detected, translated  
10 sORFs, which are listed in Table S7, and sORF56 to sORF66 represent the novel sORFs identified by  
11 proteomics. sORFs encoding small proteins below 30 amino acids are shown in blue. The putative  
12 sORF64, present in tmRNA, contains the proteolytic tag sequence. The sORF65 corresponds to the N-  
13 terminal HmuP extension; outside of Proteobacteria, it is conserved in many genera of  
14 Planctomycetes. \*Structural genomics (92% confidence homology to protein of unknown function).

15

16 Moreover, we used Phyre2 (Kelley et al. 2015) to gain insights into the potential functions  
17 of novel SEPs with  $\geq 30$  aa by analyzing their similarity to proteins with known tertiary  
18 structures (**Fig. 7; Table S8**). Best hits with a confidence homology of  $\geq 30\%$  were  
19 obtained for eight novel SEPs (**Fig. 7**). The highest confidence homology suggesting a  
20 function was obtained for the SEPs encoded by sORF38 (DNA binding; 18 of the 43 aa  
21 residues were modeled with 66% confidence homology; conserved in  
22 Alphaproteobacteria) and sORF34 (bleomycin resistance; 37 of the 39 aa residues were  
23 modeled with 92% confidence homology; conserved among Bacteria). The HmuP  
24 extension (sORF65 in **Fig. 7**; see also **Fig. 5C**) was modeled with 98% confidence along  
25 59 of its 60 aa residues; however, according to Phyre2, the function of the hit was  
26 unknown. Overall, obtaining clear functional predictions was not possible even for  
27 conserved SEPs, most probably due to their small size.

28 We also suggest the functions for three annotated sORFs/SEPs with validated translation.  
29 SEP5 (added in the RefSeq 2017 annotation) is conserved only in *Sinorhizobium*. Its  
30 translation was detected with Ribo-seq and Western blot analysis (**Fig. 6E; Table S4**).  
31 The SEP5 sORF contains a cluster of six threonine and three lysine codons near its 3' end  
32 and is located in the 5' UTR of the aspartate dehydrogenase-encoding gene. Since  
33 aspartate is a part of the threonine and lysine biosynthesis pathway (Vitreschak et al.

1 2004), our observation suggests that this sORF can be involved in the post-transcriptional  
2 regulation of the aspartate dehydrogenase gene in *Sinorhizobium*, and SEP5 is possibly a  
3 leader peptide. Furthermore, among the annotated SEPs with functional assignment,  
4 which were detected by MS, an entericidin A/B family lipoprotein was found  
5 (CP004140.1:2141558-2141716:-, **Table S4**). The 52-aa-long protein has a predicted  
6 TMH and is conserved in Alphaproteobacteria. Its *A. tumefaciens* homolog, the lipoprotein  
7 Atu8019, is involved in specific cell–cell interactions as a part of outer membrane vesicles  
8 (Knoke et al. 2020). Finally, an annotated small protein validated in this work by Ribo-  
9 seq and Western blot analysis (1 PSM in the MS) is the abovementioned SEP20 (**Fig. 6G**,  
10 **Fig. S5E; Table S4**). It contains a predicted TMH and is conserved in the  
11 Alphaproteobacteria, and its sORF is part of an uncharacterized cytochrome oxidase  
12 operon. This synteny suggests that SEP20 can participate in the assembly and/or function  
13 of the corresponding cytochrome oxidase complex, as previously shown for SEP CydX and  
14 cytochrome bd oxidase in *Brucella abortus* (Sun et al. 2012).

15

## 16 **DISCUSSION**

17 In this work, we have developed and applied a Ribo-seq workflow to comprehensively map  
18 the translome of *S. meliloti* 2011 under free-living conditions in a minimal medium. By  
19 combining Ribo-seq and MS-based proteomics in a proteogenomic approach, we added 48  
20 novel SEPs with nearly 70 aa to the *S. meliloti* annotation, that is, an increase in the number  
21 of annotated SEPs (present in at least one of the GenBank 2014 and RefSeq 2017 annotations)  
22 by approximately 17%.

23 Ribo-seq is a powerful technique for detecting translation on a global scale with high  
24 sensitivity (Ingolia et al. 2019). However, in contrast to eukaryotic model systems, codon  
25 resolution has not yet been achieved in Ribo-seq analyses of bacteria (Cianciulli Sesso et al.  
26 2021; Mohammad et al. 2019; Vazquez-Laslop et al. 2022; Venturini et al. 2020). Trapping  
27 ribosomes on mRNA and generating ribosome footprints have remained challenging,  
28 requiring careful optimization for each bacterial species. Our Ribo-seq workflow for *S.*  
29 *meliloti* includes ribosome trapping by rapid cooling of the culture without using antibiotics  
30 and cell lysis in an adapted buffer, followed by digestion of unprotected RNA by RNase I,  
31 which is not inactivated by the ribosomes of *S. meliloti* (**Fig. 1B**). RNase I has the advantage  
32 of precisely cleaving at both 5' and 3' ends of ribosome-protected mRNA without sequence

1 specificity, in contrast to the routinely used MNase (Bartholomäus et al. 2016). The digestion  
2 of 5' and 3' regions of translated mRNAs (**Fig. 1C, Fig. 3C**), higher TEs of annotated CDS in  
3 comparison to non-coding RNAs (**Fig. 2B**), and pronounced ribosome protection up to 16 nt  
4 upstream and downstream of start codons (**Fig. S2; Fig. 1C and 1D**) show the successful  
5 establishment of Ribo-seq for *S. meliloti*.

6 In addition to providing the first genome-wide ribosome-binding map of a *Hyphomicrobiales*  
7 member, our Ribo-seq analysis uncovered translation for 85 annotated sORFs and identified  
8 37 novel sORFs missing in the GenBank 2014 and Refseq 2017 annotations of the *S. meliloti*  
9 genome. The translated sORFs were found on all three replicons and had similar preferences  
10 for start and stop codons independently of whether they were annotated or novel (**Fig. 3 and**  
11 **Fig. 4**). The novel sORFs were generally shorter than the annotated ones (**Fig. 4B; Table S4**),  
12 clearly showing the advantage of the Ribo-seq method for SEP discovery. Many of the novel  
13 sORFs were probably not annotated due to their location in short transcripts considered as  
14 non-coding RNAs or asRNAs or in 5' and 3' UTRs (**Fig. 4C**).

15 Several translated novel sORFs internal to annotated genes (nested ORFs; Gray et al. 2022)  
16 were also predicted by our Ribo-seq data. However, they were excluded from the analysis as  
17 additional evidence is needed to confirm their existence. Targeted detection of translation  
18 initiation sites is useful in uncovering such sORFs by Ribo-seq (Meydan et al. 2019; Weaver  
19 et al. 2019), a strategy beyond the scope of our study. However, the existence of an internal  
20 sORF predicted by Ribo-seq was supported by the MS detection of a novel, 34-aa-long SEP  
21 translated in a different frame in the genomic region encoding SM2011\_b20335 (**Fig. 5C and**  
22 **Fig. S5G; sORF59 in Fig. 7**).

23 A challenge in defining novel sORFs for any genome is that annotations from different  
24 reference genome annotation centers can differ substantially for an identical sequence and  
25 change over time; that is, CDS are being added but are also removed in more recent  
26 annotations (see **Fig. 2F** and the “master” **Table S4**). Accordingly, two of the 48 novel SEPs  
27 are now bona fide-predicted CDS in the latest RefSeq 2022 annotation, with MS-evidence of  
28 a single PSM found with the custom iPtgxDB, whereas two other Ribo-seq-identified sORFs  
29 have variable pseudogene status in different annotation releases (see **Table S4**). iPtgxDBs,  
30 which integrate existing reference annotations and add *in silico* predicted ORFs in all six  
31 frames to virtually cover the entire protein coding potential of a prokaryote, can be used to  
32 overcome such problems and enable MS-based detection of novel SEPs (Omasits et al. 2017).

1 Here, in addition to a standard large iPtgxDB of *S. meliloti* (Melior et al. 2020), we applied the  
2 concept of a small, custom iPtgxDB lacking *in silico* predictions and including the top  
3 predictions from our experimental Ribo-seq data. This custom iPtgxDB is approximately 20-  
4 fold smaller and benefits statistics and FDR estimation (Li et al. 2016; Blakeley et al. 2012).  
5 Notably, although the identification of 11 *in silico* predicted novel sORFs was possible only  
6 with the standard iPtgxDB, the small iPtgxDB contributed substantially to the validation of  
7 annotated sORFs, increasing the number of SEPs with experimental support by 10% (**Fig. S4**).  
8 The detection of more SEPs was also facilitated by applying three experimental approaches,  
9 two of which included enrichment of small proteins. The MS detection of enriched SEPs  
10 without a proteolytic digest, including, for example, the 12 aa proteolysis tag encoded by  
11 tmRNA (**Fig. 5C** and **Fig. S5**), shows that this method can be useful for the identification of  
12 SEPs.

13 The validation of translation by Western blot analysis for 15 out of 20 analyzed novel SEPs  
14 with Ribo-seq support (**Fig. 6B–6F; Table S7**), only three of which were detected by MS with  
15 at least 2 PSMs (**Table S4**), underlines the power of the Ribo-seq technique for identification  
16 of translated sORFs. The example of SEP7 (**Fig. 6B**; 59 aa, restriction endonuclease-like,  
17 conserved in *Rhizobiaceae*), which was added to the RefSeq annotation 2017 and was  
18 detected by 2 PSMs using the small, custom iPtgxDB, illustrates the added value of the latter.  
19 Detection of translation for the novel SEP1 (23 aa, conserved in *Rhizobiaceae*) by Western  
20 blot analysis (**Fig. 6E**) and Ribo-seq (highest TE among the non-annotated translated sORFs,  
21 **Table S7**), even though it was identified by only 1 PSM in the MS analysis (**Fig. S5E**), suggests  
22 that putative SEPs with 1 PSM can be truly expressed, real small proteins. Similarly, the  
23 annotated SEP20 (46 aa, conserved in Alphaproteobacteria) was confirmed by Western blot  
24 analysis (**Fig. 6G**), although it had only 1 PSM (**Fig. S5F**) and did not pass the stringent manual  
25 evaluation of the Ribo-seq data (**Table S7**). We suggest that the conservation analysis of  
26 putative SEPs, which have minimal MS evidence (e.g., 1 PSM) and/or correspond to sORFs  
27 that did not pass the very stringent manual curation of the Ribo-seq data, can help define SEP  
28 candidates with potentially important functions that can be validated and analyzed in the  
29 future.

30 Despite the lower sensitivity of MS compared with Ribo-seq, using MS we detected 16  
31 additional SEPs that were not identified as translated by Ribo-seq. Eleven of them were novel,  
32 showing the importance of complementary methods for comprehensive analysis of bacterial

1 small proteomes. The reported numbers of validated and novel sORFs and their encoded SEPs  
2 are affected by the somewhat arbitrary cut-off of 70 aa. In fact, our data provide evidence for  
3 the translation of three additional, non-annotated proteins below 100 aa, which are  
4 considered small in other studies (Baumgartner et al. 2016; Kaulich et al. 2021; VanOrsdel et  
5 al. 2018) (see **Table S4**).

6 The functions of small proteins are difficult to predict *in silico*, often because they are too  
7 small to harbor known protein domains or motifs (Ahrens et al. 2022). In addition, for SEPs  
8 smaller than 30 aa *in silico* analysis by Phyre2 is still impossible. Keeping these limitations  
9 in mind, we present a list of putative functions corresponding to Phyre2 best hits (**Table**  
10 **S8**). Since modeling of a partial SEP sequence by Phyre2 may provide a hint of potential  
11 interactions with other proteins or protein complexes, we mention predictions based on  
12 greater than 30% confidence homology in **Fig. 7**, including the predicted DNA-binding  
13 function of the 43 aa SEP38 and a potential role in bleomycin resistance of the 39 aa SEP34.  
14 SEP function can also be predicted based on gene synteny (Ahrens et al. 2022), as  
15 mentioned above, for SEP5 (potential leader peptide encoded by a regulatory upstream  
16 sORF) and SEP20 encoded in a cytochrome oxidase operon. Our findings show that,  
17 excluding the tmRNA sORF, 13 out of the 48 novel SEPs (sORFs) are conserved in  
18 *Rhizobiaceae*, seven in *Hyphomicrobiales*, and three in at least two bacterial phyla, which  
19 likely suggests physiological relevance. Most of the translated sORFs or SEPs were detected  
20 in logarithmic cultures grown in a minimal medium, where bacteria synthesize virtually all  
21 metabolites for cell reproduction. Thus, some of these SEPs can be of general importance  
22 for growth or are needed for survival and competitiveness under oligotrophic conditions in  
23 soil and rhizosphere.

24 In summary, our work shows that a combination of methods is beneficial for increasing the  
25 number of experimentally validated SEPs. Using Ribo-seq, MS, and Western blot analysis of  
26 C-terminally tagged proteins, we provide evidence for the translation of 48 SEPs with  $\leq 70$  aa  
27 to be added to the annotation of *S. meliloti*, thus substantially increasing the number of  
28 cataloged SEPs. With the MS data, the corresponding full and small custom iPtgxDBs, and  
29 importantly, the first Ribo-seq analysis of a *Hyphomicrobiales* member, which can be viewed  
30 with an interactive online JBrowse instance (<http://www.bioinf.uni-freiburg.de/ribobase>),  
31 our study provides valuable resources for future studies on and beyond the small proteome.

## 1 **ACKNOWLEDGEMENTS**

2 We thank Stephanie Färber for the technical assistance in growing *S. meliloti* to establish  
3 Ribo-seq, and Pierre-Alexander Mücke, as well as Claudia Hirschfeld, for MS measurements.  
4 The cell-free lysates for the MS analysis were provided by Hendrik Melior. We thank Sarah L.  
5 Svensson for the critical feedback on the manuscript. This work was supported by the  
6 German Research Foundation (DFG) priority program SPP2002 “Small Proteins in  
7 Prokaryotes, an Unexplored World” grants (grant SH580/7-1 and SH580/7-2 to CMS, grant  
8 BA 2168/21-2 to RB, grant BE 3869/5-1 and BE 3869/5-2 to DB, and grant Ev 42/7-1 to EEH).  
9 Additional funding was received from the Swiss National Science Foundation (grant 197391)  
10 to CHA and from DFG (GRK2355 project number 325443116) to EEH and Germany’s  
11 Excellence Strategy (CIBSS - EXC-2189 - Project ID 390939984) to RB. Computational  
12 resources were provided by the BMBF-funded de.NBI Cloud within the German Network for  
13 Bioinformatics Infrastructure (de.NBI) (031A532B, 031A533A, 031A533B, 031A534A,  
14 031A535A, 031A537A, 031A537B, 031A537C, 031A537D, 031A538A).

## 15 **CONFLICT OF INTEREST**

16 The authors declare that they have no conflicts of interest.

## 17 **AUTHOR CONTRIBUTIONS**

18 CMS, RB, and EEH initiated the project. LH, RG, SM, RS, SA, CHA, BH, and EEH designed the  
19 experiments and analyzed the data. LH established Ribo-seq for *S. meliloti*, performed the  
20 Ribo-seq analysis, manually examined the implied novel sORFs, explored evolutionary  
21 conservation, and predicted the function of novel SEPs. RG performed the bioinformatic  
22 processing of the Ribo-seq data. SM conducted the mass-spectrometry experiments, database  
23 searches and manually evaluated spectra implying novel SEPs. BH and CHA contributed to  
24 the proteogenomic analysis to identify the known and novel SEPs, explored the value of  
25 iPtgxDBs for Ribo-seq data, consolidated experimental results in a master table, and  
26 identified annotation differences. RS, SA, and SBW performed the cloning and Western blot  
27 analyses. LH, CHA, and EEH mainly wrote the manuscript with input and feedback from the  
28 other authors. DB, RB, CMS, CHA, and EEH supervised the research and provided resources  
29 and funding. All authors approved the submitted version.

30



## 1 REFERENCES

- 2 Ahrens CH, Wade JT, Champion MM, Langer JD. 2022. A practical guide to small protein  
3 discovery and characterization using mass spectrometry. *J Bacteriol* **204**: e0035321.
- 4 Allen RJ, Brenner EP, VanOrsdel CE, Hobson JJ, Hearn DJ, Hemm MR. 2014. Conservation  
5 analysis of the CydX protein yields insights into small protein identification and  
6 evolution. *BMC Genomics* **15**: 946.
- 7 Aoyama JJ, Raina M, Zhong A, Storz G. 2022. Dual-function Spot 42 RNA encodes a 15-  
8 amino acid protein that regulates the CRP transcription factor. *Proc Natl Acad Sci USA*  
9 **119**: e2119866119.
- 10 Barra-Bily L, Fontenelle C, Jan G, Flechard M, Trautwetter A, Pandey SP, Walker GC, Blanco  
11 C. 2010. Proteomic alterations explain phenotypic changes in *Sinorhizobium meliloti*  
12 lacking the RNA chaperone Hfq. *J Bacteriol* **192**: 1719–1729.
- 13 Bartel J, Varadarajan AR, Sura T, Ahrens CH, Maaß S, Becher D. 2020. Optimized  
14 proteomics workflow for the detection of small proteins. *J Proteome Res* **19**: 4004–  
15 4018.
- 16 Bartholomäus A, Del Campo C, Ignatova Z. 2016. Mapping the non-standardized biases of  
17 ribosome profiling. *Biol Chem* **397**: 23–35.
- 18 Baumgartner D, Kopf M, Klähn S, Steglich C, Hess WR. 2016. Small proteins in  
19 cyanobacteria provide a paradigm for the functional analysis of the bacterial micro-  
20 proteome. *BMC Microbiol* **16**: 285.
- 21 Becker A, Bergès H, Krol E, Bruand C, Rüberg S, Capela D, Lauber E, Meilhoc E, Ampe F, de  
22 Bruijn FJ, et al. 2004. Global changes in gene expression in *Sinorhizobium meliloti* 1021  
23 under microoxic and symbiotic conditions. *Mol Plant Microbe Interact* **17**: 292–303.
- 24 Becker AH, Oh E, Weissman JS, Kramer G, Bukau B. 2013. Selective ribosome profiling as  
25 a tool for studying the interaction of chaperones and targeting factors with nascent  
26 polypeptide chains and ribosomes. *Nat Protoc* **8**: 2212–2239.
- 27 Beringer JE. 1974. R factor transfer in *Rhizobium leguminosarum*. *J Gen Microbiol* **84**: 188–  
28 198.
- 29 Blakeley P, Overton IM, Hubbard SJ. 2012. Addressing statistical biases in nucleotide-  
30 derived protein databases for proteogenomic search strategies. *J Proteome Res* **11**:  
31 5221–5234.
- 32 Buels R, Yao E, Diesh CM, Hayes RD, Munoz-Torres M, Helt G, Goodstein DM, Elsik CG,  
33 Lewis SE, Stein L, et al. 2016. JBrowse: a dynamic web platform for genome  
34 visualization and analysis. *Genome Biol* **17**: 66.
- 35 Burger T. 2018. Gentle introduction to the statistical foundations of false discovery rate  
36 in quantitative proteomics. *J Proteome Res* **17**: 12–22.
- 37 Casse F, Boucher C, Julliot JS, Michel M, Denarie J. 1979. Identification and  
38 Characterization of Large Plasmids in *Rhizobium meliloti* using Agarose Gel  
39 Electrophoresis. *J Gen Microbiol* **113**: 229–242.
- 40 Cassidy L, Kaulich PT, Maaß S, Bartel J, Becher D, Tholey A. 2021. Bottom-up and top-down  
41 proteomic approaches for the identification, characterization and quantification of the  
42 low molecular weight proteome with focus on short open reading frame-encoded  
43 peptides. *Proteomics* e2100008.

- 1 Cassidy L, Kaulich PT, Tholey A. 2019. Depletion of High-Molecular-Mass Proteins for the  
2 Identification of Small Proteins and Short Open Reading Frame Encoded Peptides in  
3 Cellular Proteomes. *J Proteome Res* **18**: 1725–1734.
- 4 Charoenpanich P, Meyer S, Becker A, McIntosh M. 2013. Temporal expression program of  
5 quorum sensing-based transcription regulation in *Sinorhizobium meliloti*. *J Bacteriol*  
6 **195**: 3224–3236.
- 7 Cianciulli Sesso A, Lilić B, Amman F, Wolfinger MT, Sonnleitner E, Bläsi U. 2021. Gene  
8 Expression Profiling of *Pseudomonas aeruginosa* Upon Exposure to Colistin and  
9 Tobramycin. *Front Microbiol* **12**: 626715.
- 10 Clauwaert J, Menschaert G, Waegeman W. 2019. DeepRibo: a neural network for precise  
11 gene annotation of prokaryotes by combining ribosome profiling signal and binding  
12 site patterns. *Nucleic Acids Res* **47**: e36.
- 13 Čuklina J, Hahn J, Imakaev M, Omasits U, Förstner KU, Ljubimov N, Goebel M, Pessi G,  
14 Fischer H-M, Ahrens CH, et al. 2016. Genome-wide transcription start site mapping of  
15 *Bradyrhizobium japonicum* grown free-living or in symbiosis - a rich resource to  
16 identify new transcripts, proteins and to study gene regulation. *BMC Genomics* **17**: 302.
- 17 Djordjevic MA. 2004. *Sinorhizobium meliloti* metabolism in the root nodule: a proteomic  
18 perspective. *Proteomics* **4**: 1859–1872.
- 19 Dodbele S, Wilusz JE. 2020. Ending on a high note: Downstream ORFs enhance mRNA  
20 translational output. *EMBO J* **39**: e105959.
- 21 Duval M, Cossart P. 2017. Small bacterial and phagic proteins: an updated view on a  
22 rapidly moving field. *Curr Opin Microbiol* **39**: 81–88.
- 23 Evguenieva-Hackenberg E. 2022. Riboregulation in bacteria: From general principles to  
24 novel mechanisms of the *trp* attenuator and its sRNA and peptide products. *Wiley*  
25 *Interdiscip Rev RNA* **13**: e1696.
- 26 Ewels P, Magnusson M, Lundin S, Käller M. 2016. MultiQC: summarize analysis results for  
27 multiple tools and samples in a single report. *Bioinformatics* **32**: 3047–3048.
- 28 Fancello L, Burger T. 2022. An analysis of proteogenomics and how and when  
29 transcriptome-informed reduction of protein databases can enhance eukaryotic  
30 proteomics. *Genome Biol* **23**: 132.
- 31 Fijalkowski I, Willems P, Jonckheere V, Simoens L, Van Damme P. 2022. Hidden in plain  
32 sight: challenges in proteomics detection of small ORF-encoded polypeptides. *microLife*  
33 **3**.
- 34 Galibert F, Finan TM, Long SR, Puhler A, Abola P, Ampe F, Barloy-Hubler F, Barnett MJ,  
35 Becker A, Boistard P, et al. 2001. The composite genome of the legume symbiont  
36 *Sinorhizobium meliloti*. *Science* **293**: 668–672.
- 37 Gelhausen R, Müller T, Svensson SL, Alkhnbashi OS, Sharma CM, Eggenhofer F, Backofen  
38 R. 2022. RiboReport - benchmarking tools for ribosome profiling-based identification  
39 of open reading frames in bacteria. *Brief Bioinformatics* **23**.
- 40 Gelhausen R, Svensson SL, Froschauer K, Heyl F, Hadjeras L, Sharma CM, Eggenhofer F,  
41 Backofen R. 2021. HRIBO: high-throughput analysis of bacterial ribosome profiling  
42 data. *Bioinformatics* **37**: 2061–2063.

- 1 Gelsinger DR, Dallon E, Reddy R, Mohammad F, Buskirk AR, DiRuggiero J. 2020. Ribosome  
2 profiling in archaea reveals leaderless translation, novel translational initiation sites,  
3 and ribosome pausing at single codon resolution. *Nucleic Acids Res* **48**: 5201–5216.
- 4 Gerashchenko MV, Gladyshev VN. 2014. Translation inhibitors cause abnormalities in  
5 ribosome profiling experiments. *Nucleic Acids Res* **42**: e134.
- 6 Gertz EM, Yu Y-K, Agarwala R, Schäffer AA, Altschul SF. 2006. Composition-based statistics  
7 and translated nucleotide searches: improving the TBLASTN module of BLAST. *BMC*  
8 *Biol* **4**: 41.
- 9 Glaub A, Huptas C, Neuhaus K, Ardern Z. 2020. Recommendations for bacterial ribosome  
10 profiling experiments based on bioinformatic evaluation of published data. *J Biol Chem*  
11 **295**: 8999–9011.
- 12 Gray T, Storz G, Papenfort K. 2022. Small proteins; big questions. *J Bacteriol* **204**:  
13 e0034121.
- 14 Grüning B, Dale R, Sjödin A, Chapman BA, Rowe J, Tomkins-Tinch CH, Valieris R, Köster J,  
15 Bioconda Team. 2018. Bioconda: sustainable and comprehensive software distribution  
16 for the life sciences. *Nat Methods* **15**: 475–476.
- 17 Grütznér J, Billenkamp F, Spanka D-T, Rick T, Monzon V, Förstner KU, Klug G. 2021. The  
18 small DUF1127 protein CcaF1 from *Rhodobacter sphaeroides* is an RNA-binding protein  
19 involved in sRNA maturation and RNA turnover. *Nucleic Acids Res* **49**: 3003–3019.
- 20 Guan Y, Zhu Q, Huang D, Zhao S, Jan Lo L, Peng J. 2015. An equation to estimate the  
21 difference between theoretically predicted and SDS PAGE-displayed molecular weights  
22 for an acidic peptide. *Sci Rep* **5**: 13370.
- 23 Hahn J, Tsoy OV, Thalmann S, Čuklina J, Gelfand MS, Evguenieva-Hackenberg E. 2016.  
24 Small Open Reading Frames, Non-Coding RNAs and Repetitive Elements in  
25 *Bradyrhizobium japonicum* USDA 110. *PLoS ONE* **11**: e0165429.
- 26 Hemm MR, Weaver J, Storz G. 2020. Escherichia coli Small Proteome. *Ecosal Plus* **9**.
- 27 Ingolia NT, Brar GA, Rouskin S, McGeachy AM, Weissman JS. 2012. The ribosome profiling  
28 strategy for monitoring translation in vivo by deep sequencing of ribosome-protected  
29 mRNA fragments. *Nat Protoc* **7**: 1534–1550.
- 30 Ingolia NT, Ghaemmaghami S, Newman JRS, Weissman JS. 2009. Genome-wide analysis in  
31 vivo of translation with nucleotide resolution using ribosome profiling. *Science* **324**:  
32 218–223.
- 33 Ingolia NT, Hussmann JA, Weissman JS. 2019. Ribosome profiling: global views of  
34 translation. *Cold Spring Harb Perspect Biol* **11**.
- 35 Ingolia NT. 2016. Ribosome Footprint Profiling of Translation throughout the Genome.  
36 *Cell* **165**: 22–33.
- 37 Jones KM, Kobayashi H, Davies BW, Taga ME, Walker GC. 2007. How rhizobial symbionts  
38 invade plants: the *Sinorhizobium-Medicago* model. *Nat Rev Microbiol* **5**: 619–633.
- 39 Karzai AW, Roche ED, Sauer RT. 2000. The SsrA-SmpB system for protein tagging, directed  
40 degradation and ribosome rescue. *Nat Struct Biol* **7**: 449–455.
- 41 Kaulich PT, Cassidy L, Bartel J, Schmitz RA, Tholey A. 2021. Multi-protease Approach for  
42 the Improved Identification and Molecular Characterization of Small Proteins and  
43 Short Open Reading Frame-Encoded Peptides. *J Proteome Res* **20**: 2895–2903.

- 1 Keiler KC, Shapiro L, Williams KP. 2000. tmRNAs that encode proteolysis-inducing tags  
2 are found in all known bacterial genomes: A two-piece tmRNA functions in *Caulobacter*.  
3 *Proc Natl Acad Sci USA* **97**: 7778–7783.
- 4 Kelley LA, Mezulis S, Yates CM, Wass MN, Sternberg MJE. 2015. The Phyre2 web portal for  
5 protein modeling, prediction and analysis. *Nat Protoc* **10**: 845–858.
- 6 Khan SR, Gaines J, Roop RM, Farrand SK. 2008. Broad-host-range expression vectors with  
7 tightly regulated promoters and their use to examine the influence of TraR and TraM  
8 expression on Ti plasmid quorum sensing. *Appl Environ Microbiol* **74**: 5053–5062.
- 9 Khitun A, Slavoff SA. 2019. Proteomic detection and validation of translated small open  
10 reading frames. *Curr Protoc Chem Biol* **11**: e77.
- 11 Knoke LR, Abad Herrera S, Götz K, Justesen BH, Günther Pomorski T, Fritz C, Schäkermann  
12 S, Bandow JE, Aktas M. 2020. *Agrobacterium tumefaciens* Small Lipoprotein Atu8019 Is  
13 Involved in Selective Outer Membrane Vesicle (OMV) Docking to Bacterial Cells. *Front*  
14 *Microbiol* **11**: 1228.
- 15 Köster J, Rahmann S. 2012. Snakemake--a scalable bioinformatics workflow engine.  
16 *Bioinformatics* **28**: 2520–2522.
- 17 Kovacs-Simon A, Titball RW, Michell SL. 2011. Lipoproteins of bacterial pathogens. *Infect*  
18 *Immun* **79**: 548–561.
- 19 Kraus A, Weskamp M, Zierles J, Balzer M, Busch R, Eisfeld J, Lambertz J, Nowaczyk MM,  
20 Narberhaus F. 2020. Arginine-Rich Small Proteins with a Domain of Unknown  
21 Function, DUF1127, Play a Role in Phosphate and Carbon Metabolism of *Agrobacterium*  
22 *tumefaciens*. *J Bacteriol* **202**.
- 23 Krogh A, Larsson B, von Heijne G, Sonnhammer ELL. 2001. Predicting transmembrane  
24 protein topology with a hidden Markov model: application to complete genomes. *J Mol*  
25 *Biol* **305**: 567–580.
- 26 Liao Y, Smyth GK, Shi W. 2014. featureCounts: an efficient general purpose program for  
27 assigning sequence reads to genomic features. *Bioinformatics* **30**: 923–930.
- 28 Li H, Handsaker B, Wysoker A, Fennell T, Ruan J, Homer N, Marth G, Abecasis G, Durbin R,  
29 1000 Genome Project Data Processing Subgroup. 2009. The Sequence Alignment/Map  
30 format and SAMtools. *Bioinformatics* **25**: 2078–2079.
- 31 Li H, Joh YS, Kim H, Paek E, Lee S-W, Hwang K-B. 2016. Evaluating the effect of database  
32 inflation in proteogenomic search on sensitive and reliable peptide identification. *BMC*  
33 *Genomics* **17**: 1031.
- 34 Marlow VL, Haag AF, Kobayashi H, Fletcher V, Scocchi M, Walker GC, Ferguson GP. 2009.  
35 Essential role for the BacA protein in the uptake of a truncated eukaryotic peptide in  
36 *Sinorhizobium meliloti*. *J Bacteriol* **191**: 1519–1527.
- 37 Martin M. 2011. Cutadapt removes adapter sequences from high-throughput sequencing  
38 reads. *EMBnet j* **17**: 10.
- 39 Marx H, Minogue CE, Jayaraman D, Richards AL, Kwiecien NW, Siahpirani AF, Rajasekar S,  
40 Maeda J, Garcia K, Del Valle-Echevarria AR, et al. 2016. A proteomic atlas of the legume  
41 *Medicago truncatula* and its nitrogen-fixing endosymbiont *Sinorhizobium meliloti*. *Nat*  
42 *Biotechnol* **34**: 1198–1205.

- 1 McIntosh M, Krol E, Becker A. 2008. Competitive and cooperative effects in quorum-  
2 sensing-regulated galactoglucan biosynthesis in *Sinorhizobium meliloti*. *J Bacteriol*  
3 **190**: 5308–5317.
- 4 Melior H, Li S, Madhugiri R, Stötzel M, Azarderakhsh S, Barth-Weber S, Baumgardt K,  
5 Ziebuhr J, Evguenieva-Hackenberg E. 2019. Transcription attenuation-derived small  
6 RNA rnTrpL regulates tryptophan biosynthesis gene expression in trans. *Nucleic Acids*  
7 *Res* **47**: 6396–6410.
- 8 Melior H, Li S, Stötzel M, Maaß S, Schütz R, Azarderakhsh S, Shevkoplias A, Barth-Weber  
9 S, Baumgardt K, Ziebuhr J, et al. 2021. Reprogramming of sRNA target specificity by the  
10 leader peptide peTrpL in response to antibiotic exposure. *Nucleic Acids Res* **49**: 2894–  
11 2915.
- 12 Melior H, Maaß S, Li S, Förstner KU, Azarderakhsh S, Varadarajan AR, Stötzel M, Elhossary  
13 M, Barth-Weber S, Ahrens CH, et al. 2020. The Leader Peptide peTrpL Forms Antibiotic-  
14 Containing Ribonucleoprotein Complexes for Posttranscriptional Regulation of  
15 Multiresistance Genes. *MBio* **11**.
- 16 Meydan S, Marks J, Klepacki D, Sharma V, Baranov PV, Firth AE, Margus T, Kefi A, Vázquez-  
17 Laslop N, Mankin AS. 2019. Retapamulin-Assisted Ribosome Profiling Reveals the  
18 Alternative Bacterial Proteome. *Mol Cell* **74**: 481-493.e6.
- 19 Mohammad F, Green R, Buskirk AR. 2019. A systematically-revised ribosome profiling  
20 method for bacteria reveals pauses at single-codon resolution. *eLife* **8**.
- 21 Ndah E, Jonckheere V, Giess A, Valen E, Menschaert G, Van Damme P. 2017. REPARATION:  
22 ribosome profiling assisted (re-)annotation of bacterial genomes. *Nucleic Acids Res* **45**:  
23 e168.
- 24 Nesvizhskii AI. 2010. A survey of computational methods and error rate estimation  
25 procedures for peptide and protein identification in shotgun proteomics. *J Proteomics*  
26 **73**: 2092–2123.
- 27 Oh E, Becker AH, Sandikci A, Huber D, Chaba R, Gloge F, Nichols RJ, Typas A, Gross CA,  
28 Kramer G, et al. 2011. Selective ribosome profiling reveals the cotranslational  
29 chaperone action of trigger factor in vivo. *Cell* **147**: 1295–1308.
- 30 Omasits U, Quebatte M, Stekhoven DJ, Fortes C, Roschitzki B, Robinson MD, Dehio C,  
31 Ahrens CH. 2013. Directed shotgun proteomics guided by saturated RNA-seq identifies  
32 a complete expressed prokaryotic proteome. *Genome Res* **23**: 1916–1927.
- 33 Omasits U, Varadarajan AR, Schmid M, Goetze S, Melidis D, Bourqui M, Nikolayeva O,  
34 Québatte M, Patrignani A, Dehio C, et al. 2017. An integrative strategy to identify the  
35 entire protein coding potential of prokaryotic genomes by proteogenomics. *Genome*  
36 *Res* **27**: 2083–2095.
- 37 Orr MW, Mao Y, Storz G, Qian S-B. 2020. Alternative ORFs and small ORFs: shedding light  
38 on the dark proteome. *Nucleic Acids Res* **48**: 1029–1042.
- 39 Otto C, Stadler PF, Hoffmann S. 2014. Lacking alignments? The next-generation  
40 sequencing mapper segemehl revisited. *Bioinformatics* **30**: 1837–1843.
- 41 Patraquim P, Mumtaz MAS, Pueyo JI, Aspden JL, Couso J-P. 2020. Developmental  
42 regulation of canonical and small ORF translation from mRNAs. *Genome Biol* **21**: 128.

- 1 Petruschke H, Anders J, Stadler PF, Jehmlich N, von Bergen M. 2020. Enrichment and  
2 identification of small proteins in a simplified human gut microbiome. *J Proteomics*  
3 **213**: 103604.
- 4 Petruschke H, Schori C, Canzler S, Riesbeck S, Poehlein A, Daniel R, Frei D, Segessemann  
5 T, Zimmerman J, Marinos G, et al. 2021. Discovery of novel community-relevant small  
6 proteins in a simplified human intestinal microbiome. *Microbiome* **9**: 55.
- 7 Qeli E, Ahrens CH. 2010. PeptideClassifier for protein inference and targeted quantitative  
8 proteomics. *Nat Biotechnol* **28**: 647–650.
- 9 Sallet E, Roux B, Sauviac L, Jardinaud M-F, Carrère S, Faraut T, de Carvalho-Niebel F, Gouzy  
10 J, Gamas P, Capela D, et al. 2013. Next-generation annotation of prokaryotic genomes  
11 with EuGene-P: application to *Sinorhizobium meliloti* 2011. *DNA Res* **20**: 339–354.
- 12 Schägger H. 2006. Tricine-SDS-PAGE. *Nat Protoc* **1**: 16–22.
- 13 Schlüter J-P, Reinkensmeier J, Barnett MJ, Lang C, Krol E, Giegerich R, Long SR, Becker A.  
14 2013. Global mapping of transcription start sites and promoter motifs in the symbiotic  
15  $\alpha$ -proteobacterium *Sinorhizobium meliloti* 1021. *BMC Genomics* **14**: 156.
- 16 Sharma CM, Darfeuille F, Plantinga TH, Vogel J. 2007. A small RNA regulates multiple ABC  
17 transporter mRNAs by targeting C/A-rich elements inside and upstream of ribosome-  
18 binding sites. *Genes Dev* **21**: 2804–2817.
- 19 Simon R, Priefer U, Pühler A. 1983. A broad host range mobilization system for *in*  
20 *vivo* genetic engineering: transposon mutagenesis in gram negative bacteria. *Nat*  
21 *Biotechnol* **1**: 784–791.
- 22 Sobrero P, Schlüter J-P, Lanner U, Schlosser A, Becker A, Valverde C. 2012. Quantitative  
23 proteomic analysis of the Hfq-regulon in *Sinorhizobium meliloti* 2011. *PLoS ONE* **7**:  
24 e48494.
- 25 Song K, Baumgartner D, Hagemann M, Muro-Pastor AM, Maaß S, Becher D, Hess WR. 2022.  
26 Atp $\theta$  is an inhibitor of F<sub>0</sub>F<sub>1</sub> ATP synthase to arrest ATP hydrolysis during low-energy  
27 conditions in cyanobacteria. *Curr Biol* **32**: 136-148.e5.
- 28 Stekhoven DJ, Omasits U, Quebatte M, Dehio C, Ahrens CH. 2014. Proteome-wide  
29 identification of predominant subcellular protein localizations in a bacterial model  
30 organism. *J Proteomics* **99**: 123–137.
- 31 Storz G, Wolf YI, Ramamurthi KS. 2014. Small proteins can no longer be ignored. *Annu Rev*  
32 *Biochem* **83**: 753–777.
- 33 Sun Y-H, de Jong MF, den Hartigh AB, Roux CM, Rolán HG, Tsolis RM. 2012. The small  
34 protein CydX is required for function of cytochrome bd oxidase in *Brucella abortus*.  
35 *Front Cell Infect Microbiol* **2**: 47.
- 36 Torres-Quesada O, Millán V, Nisa-Martínez R, Bardou F, Crespi M, Toro N, Jiménez-Zurdo  
37 JI. 2013. Independent activity of the homologous small regulatory RNAs AbcR1 and  
38 AbcR2 in the legume symbiont *Sinorhizobium meliloti*. *PLoS ONE* **8**: e68147.
- 39 Tyanova S, Temu T, Cox J. 2016. The MaxQuant computational platform for mass  
40 spectrometry-based shotgun proteomics. *Nat Protoc* **11**: 2301–2319.
- 41 Ulvé VM, Chéron A, Trautwetter A, Fontenelle C, Barloy-Hubler F. 2007. Characterization  
42 and expression patterns of *Sinorhizobium meliloti* tmRNA (*ssrA*). *FEMS Microbiol Lett*  
43 **269**: 117–123.

- 1 VanOrsdel CE, Kelly JP, Burke BN, Lein CD, Oufiero CE, Sanchez JF, Wimmers LE, Hearn DJ,  
2 Abuikhdair FJ, Barnhart KR, et al. 2018. Identifying New Small Proteins in *Escherichia*  
3 *coli*. *Proteomics* **18**: e1700064.
- 4 Varadarajan AR, Allan RN, Valentin JDP, Castañeda Ocampo OE, Somerville V, Pietsch F,  
5 Buhmann MT, West J, Skipp PJ, van der Mei HC, et al. 2020a. An integrated model  
6 system to gain mechanistic insights into biofilm-associated antimicrobial resistance in  
7 *Pseudomonas aeruginosa* MPAO1. *npj Biofilms and Microbiomes* **6**: 46.
- 8 Varadarajan AR, Goetze S, Pavlou MP, Grosboillot V, Shen Y, Loessner MJ, Ahrens CH,  
9 Wollscheid B. 2020b. A Proteogenomic Resource Enabling Integrated Analysis of  
10 *Listeria* Genotype-Proteotype-Phenotype Relationships. *J Proteome Res* **19**: 1647–  
11 1662.
- 12 Vazquez-Laslop N, Sharma CM, Mankin A, Buskirk AR. 2022. Identifying Small Open  
13 Reading Frames in Prokaryotes with Ribosome Profiling. *J Bacteriol* **204**: e0029421.
- 14 Venturini E, Svensson SL, Maaß S, Gelhausen R, Eggenhofer F, Li L, Cain AK, Parkhill J,  
15 Becher D, Backofen R, et al. 2020. A global data-driven census of *Salmonella* small  
16 proteins and their potential functions in bacterial virulence. *microLife*. doi:  
17 10.1093/femsml/uqaa002.
- 18 Vitreschak AG, Lyubetskaya EV, Shirshin MA, Gelfand MS, Lyubetsky VA. 2004.  
19 Attenuation regulation of amino acid biosynthetic operons in proteobacteria:  
20 comparative genomics analysis. *FEMS Microbiol Lett* **234**: 357–370.
- 21 Weaver J, Mohammad F, Buskirk AR, Storz G. 2019. Identifying Small Proteins by  
22 Ribosome Profiling with Stalled Initiation Complexes. *MBio* **10**.
- 23 Wingett SW, Andrews S. 2018. FastQ Screen: A tool for multi-genome mapping and quality  
24 control. [version 2; peer review: 4 approved]. *F1000Res* **7**: 1338.
- 25 Wiśniewski JR. 2016. Quantitative evaluation of filter aided sample preparation (FASP)  
26 and multienzyme digestion FASP protocols. *Anal Chem* **88**: 5438–5443.
- 27 Wu Q, Wright M, Gogol MM, Bradford WD, Zhang N, Bazzini AA. 2020. Translation of small  
28 downstream ORFs enhances translation of canonical main open reading frames. *EMBO*  
29 *J* **39**: e104763.
- 30 Yu NY, Wagner JR, Laird MR, Melli G, Rey S, Lo R, Dao P, Sahinalp SC, Ester M, Foster LJ, et  
31 al. 2010. PSORTb 3.0: improved protein subcellular localization prediction with refined  
32 localization subcategories and predictive capabilities for all prokaryotes.  
33 *Bioinformatics* **26**: 1608–1615.
- 34 Zeghouf M, Li J, Butland G, Borkowska A, Canadien V, Richards D, Beattie B, Emili A,  
35 Greenblatt JF. 2004. Sequential Peptide Affinity (SPA) system for the identification of  
36 mammalian and bacterial protein complexes. *J Proteome Res* **3**: 463–468.
- 37 Zevenhuizen LPTM, van Neerven ARW. 1983. (1→2)-β-d-glucan and acidic  
38 oligosaccharides produced by *Rhizobium meliloti*. *Carbohydr Res* **118**: 127–134.
- 39 Zhang Y, Fonslow BR, Shan B, Baek M-C, Yates JR. 2013. Protein analysis by  
40 shotgun/bottom-up proteomics. *Chem Rev* **113**: 2343–2394.

41

42

## 1 List of Supplementary Figures and Supplementary Tables

2 **Figure S1. Schematic representation of the plasmids used in this study.** pRS1: The  
3 plasmid that was used as a vector backbone (the multiple cloning site [MCS] is shown) to  
4 create the following plasmids (all shown below): pRS1-*T<sub>rrn</sub>*: RS1 derivative with cloned  
5 transcriptional terminator (*T<sub>rrn</sub>*). pSW1: pRS1-*T<sub>rrn</sub>* derivative with cloned sequence of the  
6 SPA-tag (SPA), preceded by a linker (L). pSW2: pSW1 derivative with cloned promoter *P<sub>sinI</sub>*,  
7 which is constitutively active in *Sinorhizobium meliloti* 2011 during growth. pSW2-SEP: pSW2  
8 derivative with a cloned sORF and its -15 5' UTR region potentially harboring a Shine-  
9 Dalgarno sequence; the sORF is cloned without the stop codon in frame with the linker and  
10 the SPA tag.

11

12 **Figure S2. Metagene analysis of *Sinorhizobium meliloti* ribosome footprints.**  
13 Genome-wide analysis of ribosome occupancy near annotated start codons. The  
14 recovered ribosome footprints (length distribution varies from 27 nt to 33 nt) were  
15 mapped using **(A)** 5' end and **(B)** 3' end approaches. Metagene analysis of the 32-nt-long  
16 ribosome footprints by the 5' end **(C)** and 3' end **(D)** mapping approaches shows that the  
17 ribosome protects a region of 16 nt upstream and downstream of annotated start codons  
18 (+1; first nucleotide of the start codon).

19

20 **Figure S3. Examples of genomic regions with high translation efficiency (TE).** **(A)** The  
21 *gabD1* gene (SM2011\_c02780) encoding for succinate semialdehyde dehydrogenase harbors  
22 a short 5' UTR (24 nt), which exhibits ribosome protection at -15/-16 upstream of the start  
23 codon that contributes to its high TE value (TE = 34.6). **(B)** The 3' UTR of the SM2011\_c01202  
24 gene encoding lipoprotein shows high ribosome density and TE. HRIBO predicts a potential  
25 novel downstream small open reading frame (sORF) in this region (25 amino acids [aa], TE =  
26 4.3). **(C)** A novel sORF is predicted in the non-coding small RNA (sRNA) SMc06505 (38 aa, TE  
27 = 3.23). This can be an example of dual-function sRNA in *Sinorhizobium meliloti* 2011.  
28 Genomic locations and coding regions are indicated below the image. Bent arrows indicate  
29 the transcription start sites based on (Sallet et al. 2013).



1 **Figure S4. Comparison of search results against the standard and custom-**  
2 **integrated proteogenomic search databases (iPtgxDBs).** (A) Venn diagram with an  
3 overview of the proteins identified by the three different experimental approaches (the  
4 colors match those from Figure 5A: gray, green, and blue represent the trypsin digest, SPE  
5 and Lys-C digest, and SPE and no protease digestion, respectively). (B) The Venn diagram  
6 shows the overlap of the number of proteins identified in the searches against the two  
7 iPtgxDBs (standard and custom iPtgxDB). The search against the 20-fold smaller custom  
8 iPtgxDb allowed the identification of 112 proteins that were not identified in the search  
9 against the much larger standard iPtgxDB. These hits include RefSeq or GenBank  
10 annotations. The 18 unique identifications made with the standard iPtgxDB include novel  
11 proteins or proteoforms contributed from Chemgenome *ab initio* predictions or *in silico*  
12 predictions that are not contained in the small custom iPtgxDB.

13

14 **Figure S5. Mass spectrometry of selected novel small open reading frame-encoded**  
15 **proteins (SEPs).** Here, we show some of the spectra that allowed us to identify novel  
16 SEPs. If more than one peptide spectrum match (PSM) was detected for a given peptide  
17 ion, a representative spectrum was selected. MS2 spectra with assigned fragment ion m/z  
18 (left) and fragmentation tables (right) were obtained with Scaffold V4.8.7 using the search  
19 output files (\*.sf3), which were deposited at the ProteomeXchange Consortium with the  
20 dataset identifier PXD034931. Colored m/z were assigned in the identifying MS2 spectra.

21

22 **Figure S6. Analysis of a putative small open reading frame (sORF) in tmRNA of**  
23 ***Sinorhizobium meliloti* 2011.** (A) Schematic view of the chromosomal *ssrA* locus  
24 corresponding to tmRNA, which is discontinuous in Alphaproteobacteria due to post-  
25 transcriptional removal of the indicated internal segment (Keiler et al. 2000; Ulvé et al.  
26 2007). The tRNA and mRNA parts of the tmRNA and their lengths are indicated. In the  
27 mRNA part, a putative sORF corresponding to a 23-amino acid (aa) SEP was predicted  
28 (the potential SEP sequence is shown). The 3' part of the sORF corresponds to the  
29 proteolytic tag-encoding sequence (the alanine encoded by the resume codon is shown in  
30 bold). The indicated parts of the *ssrA* gene were cloned in pSW2, and the *S. meliloti* 2011  
31 strains containing the corresponding plasmids were used for Western blot analysis. While

1 no specific bands were detected in lysates of the pSW2-ssrA1-containing plasmid, which  
2 lacks the tRNA part of tmRNA (data not shown), a strong signal was obtained with the  
3 pSW2-ssrA2 plasmid, which contains both the tRNA and mRNA parts (see panel C). **(B)**  
4 Schematic representation of the *ssrA* part cloned in pSW2-ssrA2. The used mutations are  
5 indicated. 1: Conserved GG nucleotides upstream of the putative start codon TTG were  
6 mutated to TT. 2: The resume codon was changed to encode valine instead of alanine. 3:  
7 The putative start codon TTG was mutated to the stop codon TAG. **(C)** Western blot  
8 analysis with antibodies directed against the FLAG part of the sequential peptide affinity  
9 (SPA) tag, which was fused in frame to the proteolytic tag. Crude lysates (corresponding  
10 to 20 OD) of *S. meliloti* 2011 strains containing the indicated plasmids (see panels A and  
11 B) were analyzed. The detected bands above 25 kDa have identical lengths. Expression of  
12 the corresponding SPA-tagged peptide was abolished by the indicated GG/TT mutation,  
13 which disrupts conserved base pairing in the tmRNA (Keiler et al. 2000), whereas a weak  
14 signal was still detected when the resume codon was mutated. Destroying the putative 23  
15 aa sORF (TTG/TAG mutation in variant 3) did not abolish the expression of the tagged  
16 peptide. These results, combined with no detection of a peptide using pSW2-ssrA1,  
17 suggest that the SPA-tagged peptide detected in panel C corresponds to the 12 aa  
18 proteolytic tag and not to the putative 23 aa SEP. Furthermore, the data support the  
19 important role of the analyzed GG nucleotides for the tmRNA function.

20

21 **Figure S7. Analysis of the S100 and P100 fractions of *Sinorhizobium meliloti* 2011**  
22 **strains producing the indicated small open reading frame-encoded proteins (SEPs)**  
23 **from pSW2-SEP plasmids.** The empty vector control (EVC) strain was used as the  
24 negative control. Identical volumes of the S100 and P100 fractions were loaded. Top  
25 panels: Western blot analysis with monoclonal anti-FLAG antibodies. Bottom panels:  
26 Coomassie-stained gels, in which the used protein fractions are shown. Migration of  
27 marker proteins (in kDa) is shown on the left side, and exposition times are indicated. \*  
28 Unspecific signal.

29

30

31

## 1 **Supplementary Tables**

### 2 **Table S1. Distribution of total mapped reads to different annotated RNA classes.**

3 The table indicates the total number of mapped reads mapping to annotations for  
4 different RNA classes (mRNA, rRNA, and tRNA).

5

### 6 **Table S2. Translation efficiency values for all annotated genes of *Sinorhizobium*** 7 ***meliloti* 2011.**

8 This table is generated by the HRIBO pipeline and contains information about the  
9 annotated features extracted from the used GenBank 2014 annotation. It contains  
10 information, such as the gene identifier, the start and stop codons, the encoding strand,  
11 locus tags, nucleotides/amino acid sequences, and information regarding the encoded  
12 protein, translation efficiency (TE), as well as the RPKM values. The RPKM values were  
13 calculated directly after the removal of multi-mapping reads and before the removal of  
14 reads mapping to rRNA.

15

### 16 **Table S3. Overview of the six integrated proteogenomic search databases** 17 **(iPtgxDBs) created for this project.**

18 Three large standard iPtgxDBs were created: one for trypsin, one for Lys-C, and a modified  
19 version for the experimental approach without proteolytic digestion. On the top, three  
20 approximately 20-fold smaller custom iPtgxDBs were created using experimental  
21 ribosome profiling data instead of the Chemgenome *ab initio* predictions and the large  
22 number of *in silico* predictions that aim to capture the entire protein coding potential.

23 **Table S3.1:** Size of the six annotation sources (three reference genome annotations, two  
24 *ab initio* predictions, and the *in silico* prediction) and the added novelty (new clusters,  
25 new reductions, and new extensions) achieved through the step-wise, hierarchical  
26 integration carried out for the standard iPtgxDBs.

27 **Table S3.2:** Database entries and number of excluded entries for the three standard  
28 iPtgxDBs for trypsin, Lys-C, and without proteolytic digestion.

1 **Table S3.3:** Size of the five annotation sources (three reference genome annotations, one  
2 *ab initio* prediction, and experimental ribosome profiling data) and the added novelty  
3 (new clusters, new reductions, new extensions) achieved through the step-wise,  
4 hierarchical integration carried out for the three smaller custom iPtgxDBs.

5 **Table S3.4:** Database entries and number of excluded entries for the three custom  
6 iPtgxDBs for trypsin, LysC, and without proteolytic digestion.

7

8 **Table S4. “Master table”, with an overview of various datasets detailed in the**  
9 **manuscript.**

10 This table lists several datasets described in the manuscript and allows researchers to  
11 select/filter them. It contains information about genomic location and annotation for the  
12 6263 CDS (GenBank 2014 annotation) and their match with the RefSeq 2017 annotation.  
13 For the ribosome profiling (Ribo-seq) data, we listed the 3,758 GenBank annotated open  
14 reading frames (ORFs) identified as translated in minimal medium (translation efficiency  
15 [TE] of  $\geq 0.5$  and RNA-seq and Ribo-seq RPKM of  $\geq 10$ ), all 259 GenBank annotated small  
16 (sORFs) ( $\leq 70$  amino acids [aa]), and the 85 GenBank annotated sORFs identified as  
17 translated after manual curation (Figures 2 and 3). Furthermore, listed are the 266  
18 potentially novel Ribo-seq implied sORFs (not present in the GenBank 2014 annotation;  
19 TE of  $\geq 0.5$ , RNA-seq and Ribo-seq RPKM of  $\geq 10$ , DeepRibo score of  $> -0.5$ ), and the subset  
20 of 54 manually curated, high-confidence non-annotated sORFs (Figure 4). For the mass  
21 spectrometry (MS) data, a list of 191 sORF-encoded proteins (SEPs) can be filtered, among  
22 which at least one peptide spectrum match (PSM) was identified, the 58 SEPs that pass  
23 the more stringent PSM filters (Figure 5), and the respective search database results  
24 where they were detected (standard integrated proteogenomic search databases  
25 [iPtgxDB], custom iPtgxDB or both). A total of 20 candidates for which Western blot  
26 validation was attempted (15 thereof with success) can then be selected (Figure 6), as  
27 well as the 48 novel sORFs missing from both the GenBank 2014 and Refseq 2017  
28 annotations, and 37 detected by Ribo-seq and 11 by proteomics (Figure 7). Finally, the  
29 PSM counts and identifiers contained in the large standard iPtgxDB and the small custom  
30 iPtgxDB of the 1,219 proteins identified by MS are provided.

31

1 **Table S5. Oligonucleotides used in this study.**

2

3 **Table S6. List of annotated open reading frames (ORFs) and small ORFs (sORFs)**  
4 **detected as translated in *Sinorhizobium meliloti* 2011 by ribosome profiling (Ribo-**  
5 **seq).**

6 Using Ribo-seq (average translation efficiency [TE] of  $\geq 0.5$  and RNA-seq and Ribo-seq  
7 RPKM of  $\geq 10$  in both replicates), translation was detected for 3,758 ORFs out of the 6,263  
8 annotated ORFs. In addition, we manually curated each annotated sORF with an average  
9 TE of  $\geq 0.5$  and RNA-seq and Ribo-seq RPKM of  $\geq 10$  (in both replicates) in a genome  
10 browser. Based on the manual curation, translation was detected for 85 of the 259  
11 annotated *Sinorhizobium meliloti* sORFs (GenBank annotation 2014).

12

13 **Table S7: List of non-annotated translated small open reading frames (sORFs)**  
14 **identified in *Sinorhizobium meliloti* 2011 by ribosome profiling (Ribo-seq).**

15 The two prediction tools DeepRibo and Reparation, which are implemented in the HRIBO  
16 pipeline, predicted a high number of translated sORFs (approximately 15,000 sORFs). To  
17 cope with and prioritize this high number of predictions, we first applied cut-offs (average  
18 translation efficiency of  $\geq 0.5$  and RNA-seq and Ribo-seq RPKM of  $\geq 10$  in both replicates,  
19 and DeepRibo score of  $> -0.5$ ), which resulted in a list of 266 potential, translated, non-  
20 annotated sORFs (see Table S4) (GenBank annotation 2014). We then manually curated  
21 each of these 266 predicted sORFs in a genome browser. The resulting list of 54 non-  
22 annotated sORFs, which we propose with high confidence to be translated, is presented  
23 in this table..

24

25 **Table S8: List of the 48 novel small open reading frames identified in *Sinorhizobium***  
26 ***meliloti* 2011 using ribosome profiling and proteomics.** A list of Phyre2 best hits is  
27 also provided.
